# Supplementary material for: Reprogrammed tracrRNAs enable repurposing RNAs as crRNAs and detecting RNAs
Source: bioRxiv or medRxiv preprint supplement (doi:10.1101/2021.05.24.445356), 2021-05-28
Supplement: Supplementary file [file media-1.pdf]

# Supplementary Information

## Reprogrammed tracrRNAs enable repurposing RNAs as crRNAs and detecting RNAs

Yang Liu<sup>1</sup>, Filipe Pinto<sup>1†</sup>, Xinyi Wan<sup>1,2†</sup>, Shuguang Peng<sup>3</sup>, Mengxi Li<sup>1</sup>, Zhen Xie<sup>3</sup>, Christopher E. French<sup>1,4</sup>, Baojun Wang<sup>1,2,4\*</sup>

<sup>1</sup>Centre for Synthetic and Systems Biology, School of Biological Sciences, University of Edinburgh, Edinburgh EH9 3FF, UK

<sup>2</sup>Hangzhou Innovation Center, Zhejiang University, Hangzhou 311200, China

<sup>3</sup>Center for Synthetic and System Biology, Department of Automation, Beijing National Research Centre for Information Science and Technology, Tsinghua University, Beijing 100084, China

<sup>4</sup>Zhejiang University-University of Edinburgh Joint Research Centre for Engineering Biology, Zhejiang University International Campus, Haining 314400, China

†These authors contributed equally to this work.

\*Correspondence can be addressed to BW ([baojun.wang@ed.ac.uk](mailto:baojun.wang@ed.ac.uk))

### Supplementary Figures 1–8

### Supplementary Tables 1–9

### References 1–2

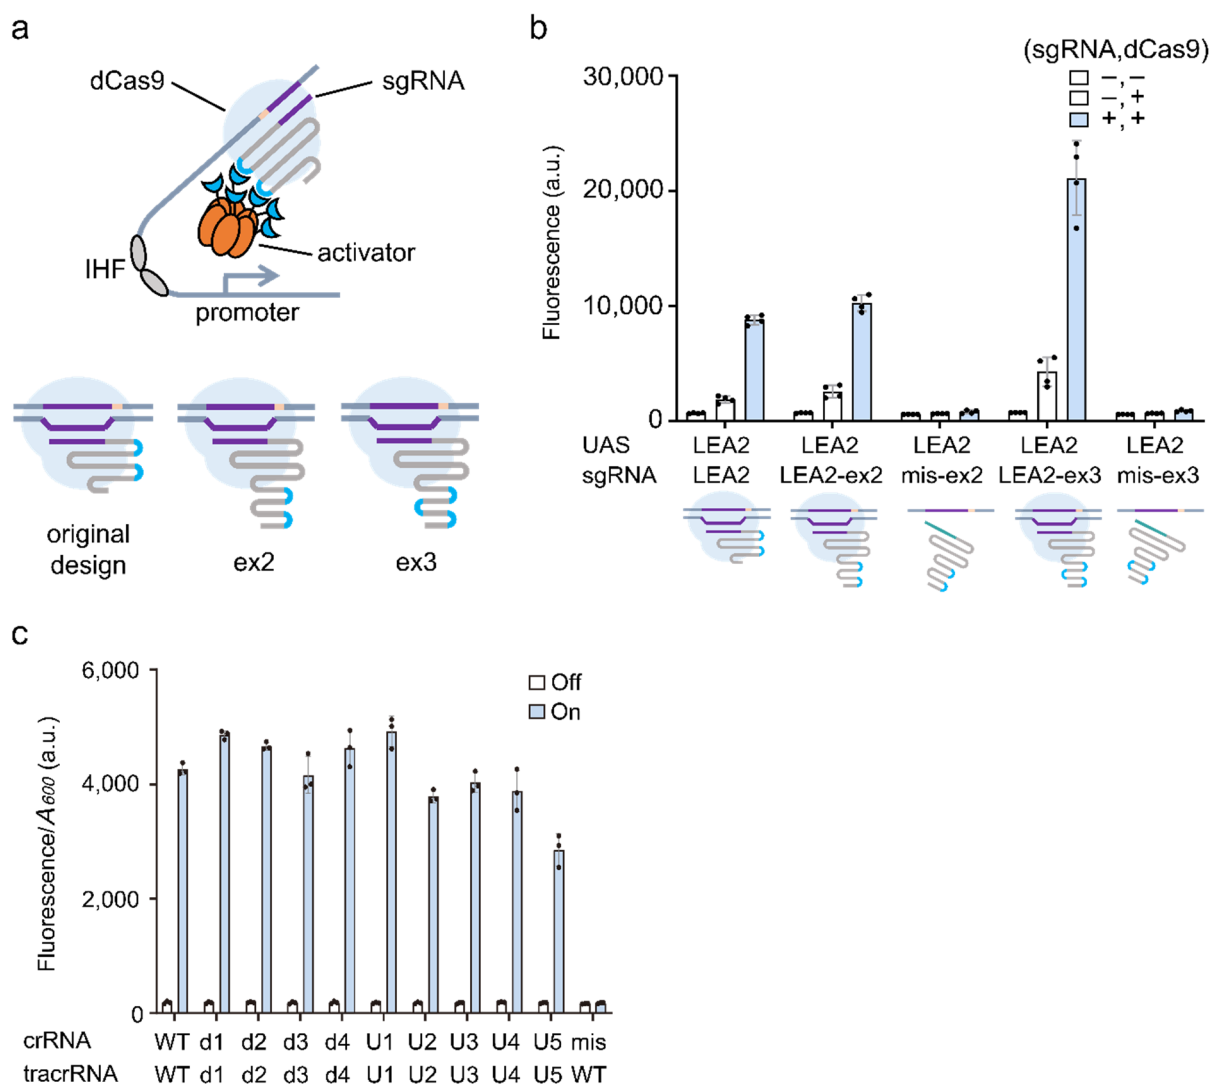

**Supplementary Figure 1. CRISPRa function with tail-fused aptamers and CRISPRa output from reprogrammed crRNA-tracrRNA pairs**

**(a)** Schematic of the CRISPRa devices showing three different designs of sgRNA. The light blue U shape line segments in the sgRNA scaffold indicate BoxB RNA aptamers. **(b)** CRISPRa function with three different kinds of sgRNA design. The random sequence LEA2 was used and UAS and sgRNA spacer. For each of the two new designs, a sgRNA with the same sgRNA scaffold but with different spacer (random sequence LEA3) was employed as mismatched control. dCas9 expression was controlled by  $P_{tet}$  promoter, and activator expression was driven by a constitutive promoter J23106 (Anderson promoter). A  $P_{lux2}$  promoter was used to transcribe sgRNA. 2.5 ng mL<sup>-1</sup> aTc and 1.6  $\mu$ M AHL were used for dCas9 and sgRNA induction respectively. Error bars, s.d. ( $n = 4$ ). **(c)** The CRISPRa function of the various crRNA-tracrRNA pairs in the library shown in **Figure 1e**. The label ‘mis’ means the WT crRNA has a mismatched spacer (LEA3) with the target UAS (LEA2). All the other crRNAs in this test have spacer LEA2, and a corresponding  $\sigma^{54}$ -dependent promoter with UAS LEA2 was used for the reporter. Expression of dCas9 and activator expression was driven by the  $P_{tet}$  and constitutive promoter J23106. A  $P_{lux2}$  promoter was used to transcribe sgRNA. No inducer was added for the OFF state. 2.5 ng mL<sup>-1</sup> aTc, 1.6  $\mu$ M AHL, and 0.08 mM arabinose were used for dCas9, crRNA, tracrRNA induction (ON state), respectively. Error bars, s.d. ( $n = 3$ ); a.u., arbitrary units.

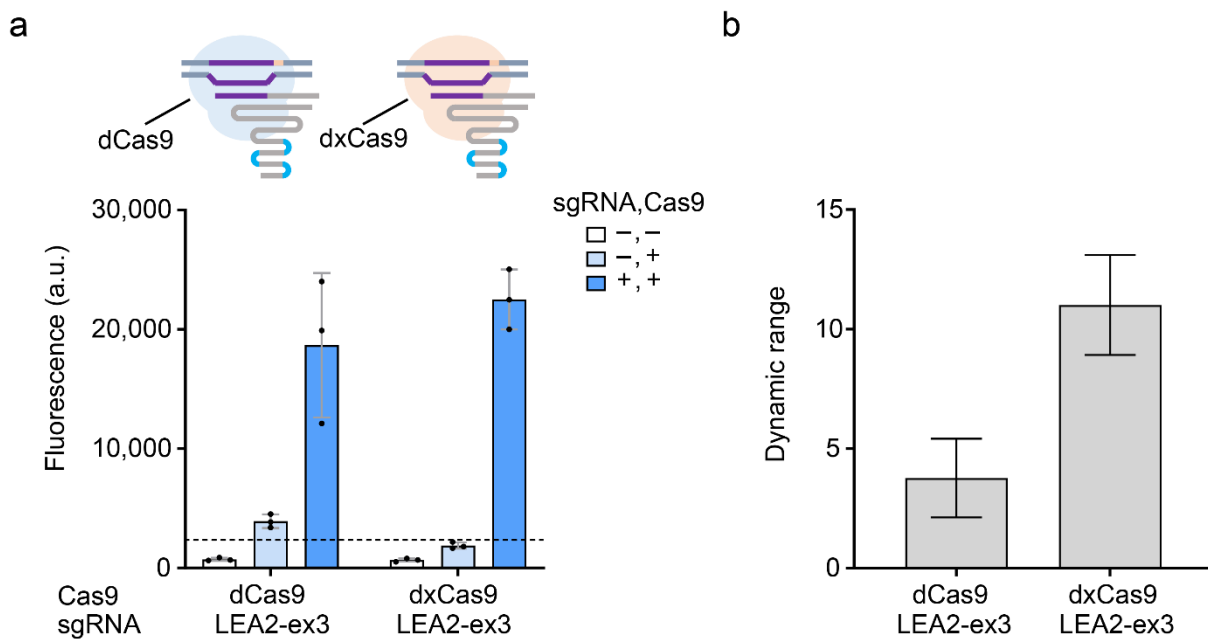

**Supplementary Figure 2. sgRNA tuning-based output dynamic range can be improved by employing dxCas9 instead of dCas9.** (a) A sgRNA with three BoxB aptamers added to its 3' end tail (LEA2-ex3) was used for CRISPRa. The UAS of promoter and spacer of sgRNA had the LEA2 sequence.  $P_{tet}$  controlled dCas9 or dxCas9 generator, and  $P_{rhaB}$  drove activator expression,  $P_{lux2}$  drove sgRNA transcription. Inducer concentrations: 2.5 ng mL<sup>-1</sup> aTc, 0.4 mM rhamnose, and 1.6  $\mu$ M AHL. The plus and minus signs represent the presence or absence of inducers, respectively. (b) The sgRNA tuning based dynamic range was calculated from the two sets of data with dCas9 or dxCas9 in the left bar chart. Error bars, s.d. ( $n = 3$ ); a.u., arbitrary units.

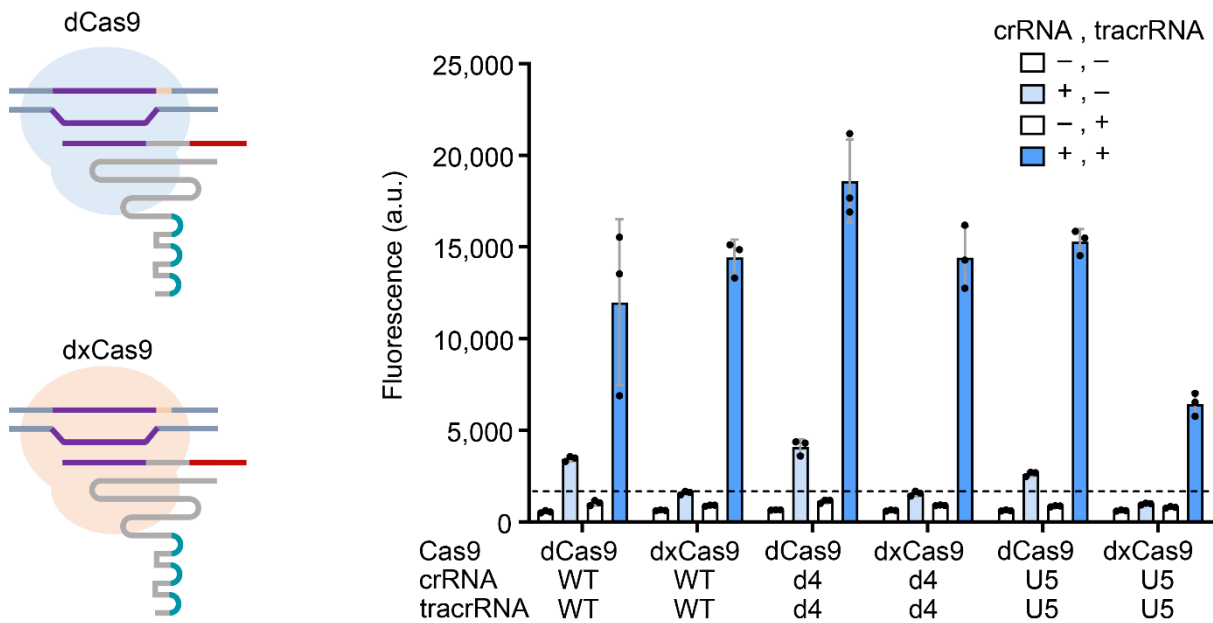

**Supplementary Figure 3. Optimizing asymmetry sensitivity to inputs of crRNA-tracrRNA mediated CRISPRa by utilizing dxCas9.**

The cartoon on the left shows the two CRISPR complexes used in the experiment. The purple line segment represents DNA and its complementary paired spacer sequence of crRNA. The red line indicates the terminator sequence on crRNA. The blue U shaped segment indicates BoxB aptamers at the tail of tracrRNA. The bar chart on the right shows the output of three CRISPRa devices with different crRNA-tracrRNA matching sequences (WT, d4, U5). Random sequence LEA2 was used for UAS and spacer in these circuits. Expression of dCas9 or dxCas9 was driven by  $P_{tet}$ , and expression of activator was driven by  $P_{rhaB}$ . crRNA and tracrRNA transcription was driven by  $P_{lux2}$  and  $P_{BAD}$ , respectively. Inducer concentrations:  $2.5 \text{ ng mL}^{-1}$  aTc,  $0.4 \text{ mM}$  rhamnose,  $1.6 \text{ }\mu\text{M}$  AHL, and  $0.08 \text{ mM}$  arabinose. The plus and minus signs represent the presence or absence of inducers. Error bars, s.d. ( $n = 3$ ); a.u., arbitrary units.



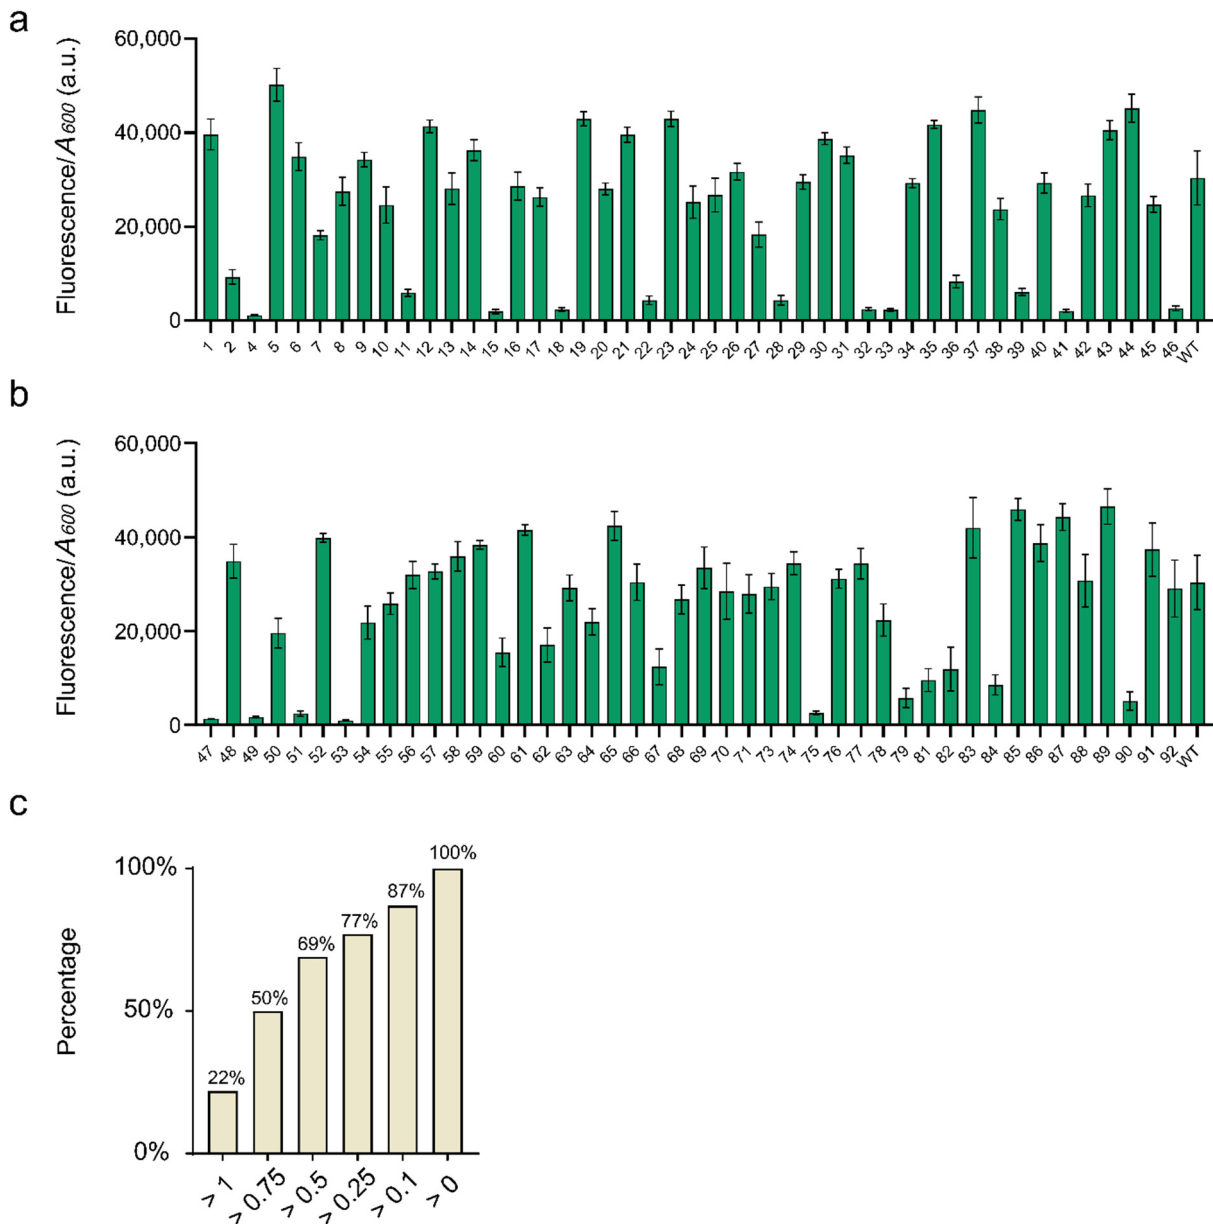

**Supplementary Figure 5. CRISPRa output from the paired crRNA-tracrRNA randomized-sequence library.** (a) The CRISPRa output from strains 1 – 46 and a positive control strain with the WT crRNA-tracrRNA matching region sequence. The dCas9 generator was controlled by  $P_{tet}$ . The crRNA and tracrRNA transcription and activator expression was driven by Promoter J23106.  $2.5 \text{ ng mL}^{-1}$  aTc was used in this test. Error bars, s.d. ( $n = 3$ ); a.u., arbitrary units. (b) The CRISPRa output from strains 47 – 92 and a positive control strain with the WT crRNA-tracrRNA matching region sequence. The induction condition is the same as in a. Error bars, s.d. ( $n = 3$ ); a.u., arbitrary units. (c) The percentage of the candidates whose output level is higher than a certain value. The abscissa defines the output range for each group, the values are the different multipliers for output from the positive control strain. The corresponding output lower limit is the product of these multipliers and the output value from the positive control strain.

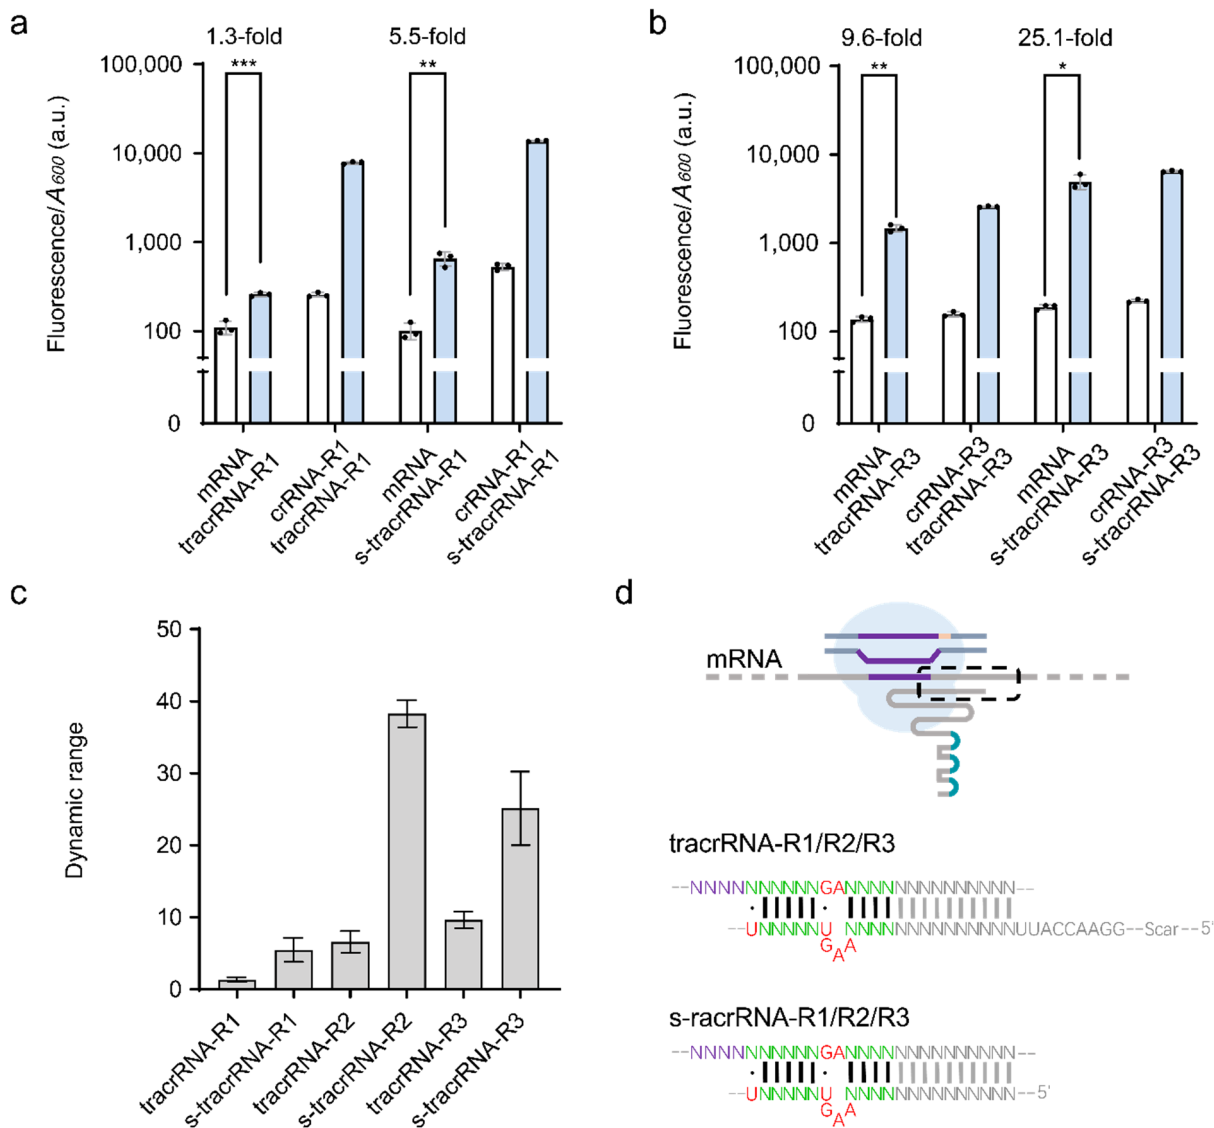

**Supplementary Figure 6. Engineered tracrRNA repurposes mRNA into crRNA.** (a) 5' end truncation of tracrRNA improves the mRNA-mediated CRISPR function. The mRNA fragment with the same sequences as that in the mRNA target site R1 was expressed as controls. For the bar of mRNA + tracrRNA-R1, the data is the same as in **Figure 3b**. Expression of dCas9 and activator was driven by the  $P_{tet}$  and  $P_{rhaB}$  promoters, respectively. The mRNA of RFP and the tracrRNA were transcribed from  $P_{lux2}$  and  $P_{BAD}$ , respectively. Inducer concentrations:  $2.5 \text{ ng mL}^{-1}$  aTc,  $0.2 \text{ mM}$  rhamnose, and  $0.08 \text{ mM}$  arabinose.  $0.1 \text{ } \mu\text{M}$  AHL was used for mRNA expression. Statistical difference was determined by a two-tailed  $t$  test: mRNA + s-tracrRNA-R1,  $p = 0.0014$ ,  $t = 7.904$ . Error bars, s.d. ( $n = 3$ ) (b) The content is the same as in **a**, except that the RNA target is R3. Statistical difference was determined by a Welch's  $t$  test: mRNA + s-tracrRNA-R3,  $p = 0.0121$ ,  $t = 8.994$ . Error bars, s.d. ( $n = 3$ ). (c) The dynamic range of different mRNA-mediated CRISPRa devices. All the induction condition is the same as in **a**. Error bars, s.d. ( $n=3$ ). (d) Schematic diagram shows the structures of the hybridizing regions for the original tracrRNA version and the 5' end truncated tracrRNA. a.u., arbitrary units.

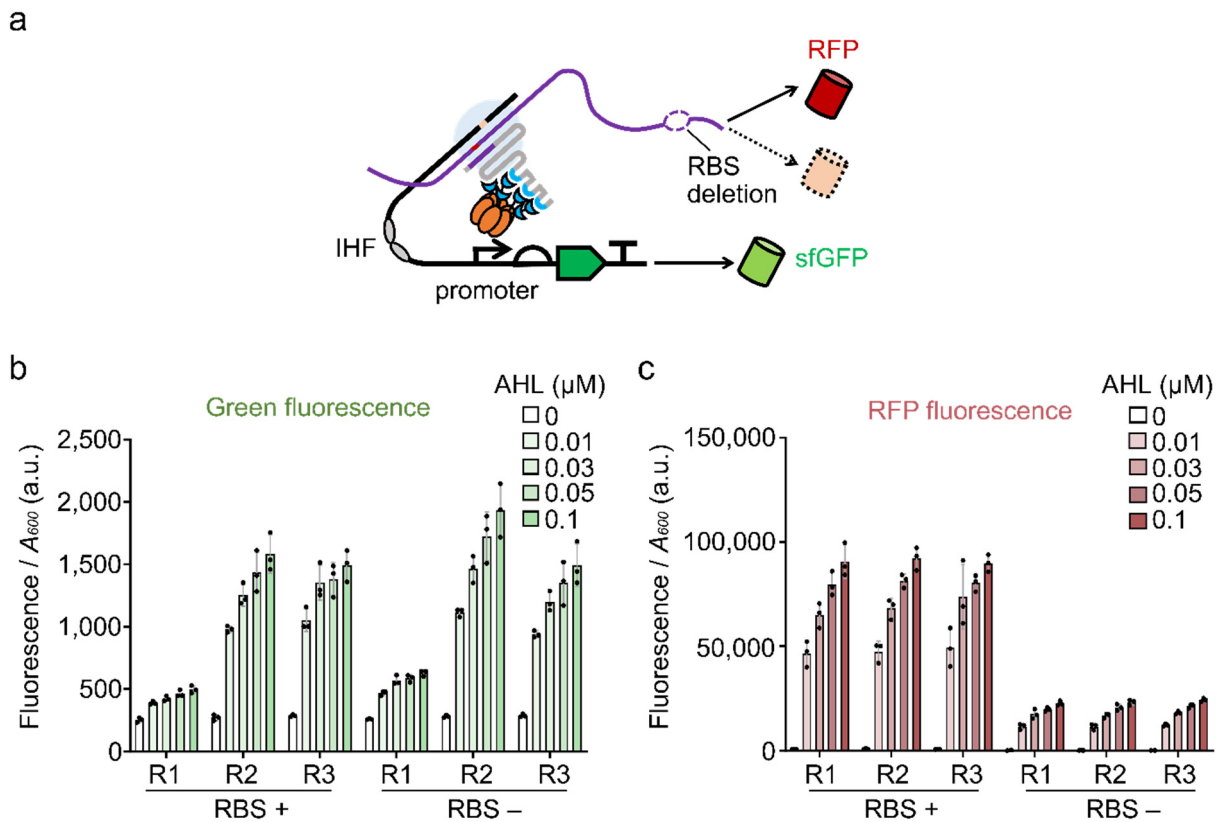

**Supplementary Figure 7. Test of ribosome binding site (RBS) deletion in the RFP mRNA**

**hijacking experiment. (a)** Schematic showing the circuit design for the RBS deletion experiment.

The oval purple dotted line represents the RBS, and the red cylindrical structure drawn by the dotted line indicates that the translation of red fluorescent protein is greatly reduced after the RBS is deleted.

**(b)** The green fluorescence output from the mRNA mediated CRISPRa with or without an RBS on the mRNA of RFP. Expression of dCas9 and activator was driven by  $P_{tet}$  and  $P_{rhaB}$  promoters. mRNA and tracrRNA transcription were driven by  $P_{lux2}$  and  $P_{BAD}$ , respectively. Inducer concentrations: 2.5 ng mL<sup>-1</sup> aTc, 0.2 mM rhamnose, and 0.08 mM arabinose. AHL gradient (0, 0.01, 0.03, 0.05, 0.1 μM) was used for mRNA induction. **(c)** The red fluorescence output from the mRNA mediated CRISPRa with or without an RBS on the mRNA of RFP. The data was from the same experiment in **b**. Error bars, s.d. ( $n = 3$ ). a.u., arbitrary units.





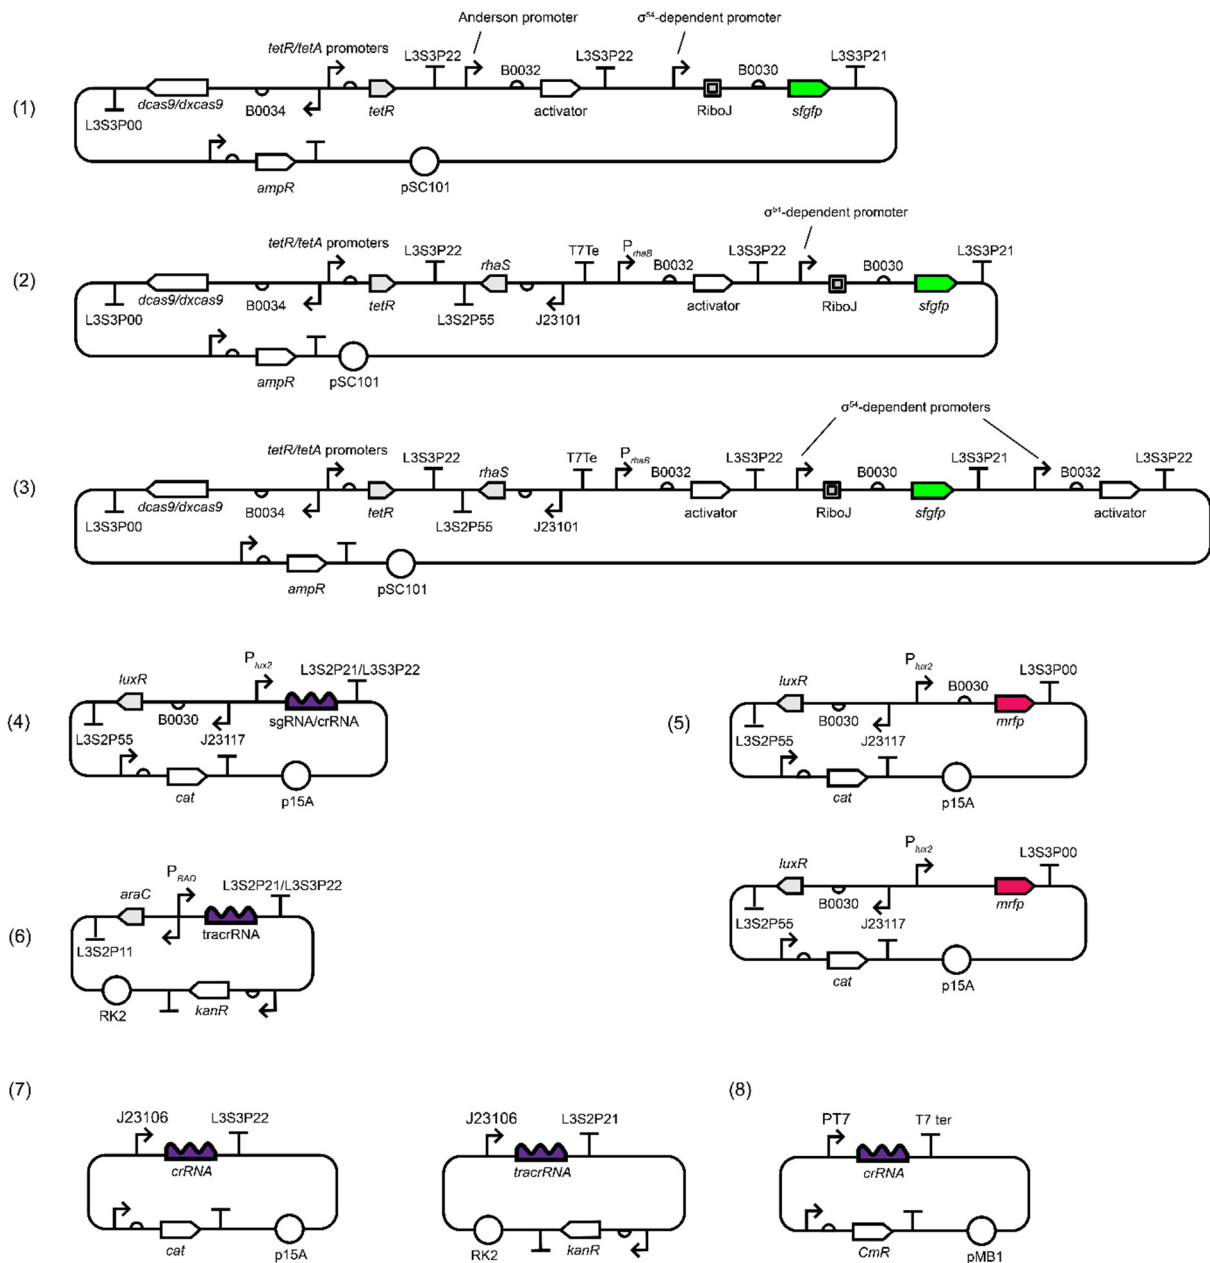

**Supplementary Figure 9. Representative plasmid maps for key circuit constructs used in this study. (1)** The plasmid map of pLY54. pLY54 was used in the experiments in **Figure 1,2**, and also was used in tests of **Supplementary Figure 1–5**. **(2)** The plasmid map of pLY162–pLY164, and pLY167–pLY169, pLY255, pLY256. pLY162–pLY164 were used in the RFP mRNA hijacking experiment (**Figure 3, Supplementary Figure 6,7,8**); pLY167, pLY168, pLY255, pLY256 are reporter circuits for the hijacking of endogenous mRNA of the arsenic-related gene cluster in *E. coli* (**Figure 4**); pLY169 is the CRISPRa circuit with dxCas9, which was used in experiments of **Supplementary Figure 2,3**. **(3)** The plasmid map of pLY165 and pLY166, they are positive feedback circuits used in **Figure 3**. **(4)** The plasmid map of pLY76, pLY170–pLY184, pLY187–pLY189, pLY218–pLY231 and pLY246. They are all the crRNA generators in this study. **(5)** The plasmid map of pLY185 and pLY186. They are two mRFP generators with or without RBS, which were used in **Supplementary Figure 7**. **(6)** The plasmid map of pLY190–pLY217, pLY232–pLY239, pLY251–pLY254. They are all the tracrRNA generators in this study. **(7)** The plasmid map of pLY241–pLY250, and the 180 crRNA/tracrRNA generators in our library (**Supplementary Table 1**). **(8)** The plasmid map of pLY240, which is a CONAN circuit (**Figure 5**).

## Supplementary tables

**Supplementary Table 1: Sequences from the library of randomized hybridizing region of the paired crRNA-tracrRNA**

| Name | Sequence in hybridized region<br>(crRNA 5' – 3') | Sequence in hybridized region<br>(tracrRNA 5' – 3') |
|------|--------------------------------------------------|-----------------------------------------------------|
| c(+) | GUUUUAGAGCUAUGC                                  | GCAUAGCAAGUAAAAU                                    |
| c1   | AGCAGGGAACAGACU                                  | AGUCUGUAAGUCCUGCU                                   |
| c2   | GAUCGGUAAAAGUUA                                  | UACUUUAAGUCCGAUU                                    |
| c4   | AAAUGUAUUUAAAAGA                                 | UCUUUAAAAGUACAUUU                                   |
| c5   | AUUCACAUGAAUCCU                                  | AGGAUUCAAGUGUGAAU                                   |
| c6   | UACGUACCGGGUGAA                                  | UUCACCCAAGUUACGUU                                   |
| c7   | CAGGCUCGGAUGUCC                                  | GGACAUCAAGUAGCCUU                                   |
| c8   | UUCAACCAGCCCUUG                                  | CAAGGGCAAGUGUUGAU                                   |
| c9   | AGAAUCCUCGCUCAG                                  | CUGAGCGAAGUGAUUCU                                   |
| c10  | GCCUGGAACACCUAU                                  | AUAGGUGAAGUCCAGGU                                   |
| c11  | CCCUGAUACCCUGUU                                  | AACAGGGAAGUUCAGGU                                   |
| c12  | GUUCGCGCACGCGCG                                  | CGCGCGUAAGUGCGAAU                                   |
| c13  | CACCUCGAGCGCUG                                   | CAGCGCUAAGUGAGGUU                                   |
| c14  | GGUCUCACCCUUCAA                                  | UUGAAGGAAGUGAGACU                                   |
| c15  | AAAGAAUUUCUGAU                                   | AUCAGAAAAGUUUCUUU                                   |
| c16  | UCGCGUUUUGUAACU                                  | AGUUACAAAGUACGCGU                                   |
| c17  | GACUCAUGGGUAUUU                                  | AAAUACCAAGUUGAGUU                                   |
| c18  | CAA AUGUCGUUUUG                                  | CAAUACAAGUCAUUUU                                    |
| c19  | GGCCUCGAAUCCAUG                                  | CAUGGAUAAGUGAGGCU                                   |
| c20  | GACCAUAUGGCGGG                                   | CCCGCCAAAGUUGGGUU                                   |
| c21  | CCAGUGUCUCCAAC                                   | GUUGGGAAGUCACUGU                                    |
| c22  | UCGAGAUGACUUUCU                                  | AGAAAGUAAGUUCUCGU                                   |
| c23  | GGAGAAUAGUUGCG                                   | CGCAACUAAGUUUCUCU                                   |
| c24  | CCAUAGAUGAUCAUU                                  | AAUGAUCAAGUCUAUGU                                   |
| c25  | UCCAACAAUCCACAC                                  | GUGUGGAAAGUGUUGGU                                   |

| Name | Sequence in hybridized region<br>(crRNA 5' – 3') | Sequence in hybridized region<br>(tracrRNA 5' – 3') |
|------|--------------------------------------------------|-----------------------------------------------------|
| c26  | ACUAGUUUCCCAAG                                   | CUUGGGAAGUACUAGU                                    |
| c27  | CGACAAAAGAGUUAA                                  | UUAACUCAAGUUUGUCU                                   |
| c28  | GCUGGGGCAGCCCUA                                  | UAGGGCUAAGUCCAGU                                    |
| c29  | CGAGAUGUGUUGGUU                                  | AACCAACAAGUAUCUCU                                   |
| c30  | CCAGUAAGACACAGC                                  | GCUGUGUAAGUUACUGU                                   |
| c31  | ACGGUCCACUCUUUU                                  | AAAAGAGAAGUGACCGU                                   |
| c32  | GCGCUAAAAUAGCUG                                  | CAGCUAUAAGUUAGCGU                                   |
| c33  | CGAUUUGAGGCUGAG                                  | CUCAGCCAAGUAAAUCU                                   |
| c34  | GUGUUAAAAUCCUUG                                  | CAAGGAUAAGUUAACAU                                   |
| c35  | AAAUUGGUCUUAACC                                  | GGUUAAGAAGUCAAUUU                                   |
| c36  | UAGGAGCUUGACAGA                                  | UCUGUCAAGUCUCCUU                                    |
| c37  | CUGCCGUGUGUCAGU                                  | ACUGACAAAGUCGGCAU                                   |
| c38  | UUCAGGCGCCUCUGC                                  | GCAGAGGAAGUCCUGAU                                   |
| c39  | AGCCGGACCACCGAG                                  | CUCGGUGAAGUCCGGCU                                   |
| c40  | UUGGAAGUCCUCCGG                                  | CCGGAGGAAGUUUCCAU                                   |
| c41  | GUCUAAUCGACCUAG                                  | CUAGGUCAAGUUUAGAU                                   |
| c42  | UUCGGGUUCAGCGCA                                  | UGCGCUGAAGUCCCGAU                                   |
| c43  | UACUCCUUUACGAAA                                  | UUUCGUAAAGUGGAGUU                                   |
| c44  | CAUUGAGCCGUUGCC                                  | GGCAACGAAGUUCAAUU                                   |
| c45  | ACCUGGUGCUGAUCA                                  | UGAUCAGAAGUCCAGGU                                   |
| c46  | UAGACCCAGGCCGGC                                  | GCCGGCCAAGUGGUCUU                                   |
| c47  | UACUUUGGAAAUAUA                                  | UAUAUUUAAGUAAAAGUU                                  |
| c48  | AUUAAUUGCCGACACA                                 | UGUGUCGAAGUAAUAAU                                   |
| c49  | GCUGUUUAGAGGCUG                                  | CAGCCUCAAGUAACAGU                                   |
| c50  | CGAGUGUCGACCCUG                                  | CAGGGUCAAGUCACUCU                                   |
| c51  | GUAAUGAUCCGUAAU                                  | AUUACGGAAGUCAUUUU                                   |
| c52  | CUUAUCCGGCAACGC                                  | GCGUUGCAAGUGAUAAU                                   |
| c53  | UCCGCGACCGCGGG                                   | CCCGCCAAGUCGCGGU                                    |
| c54  | UCGAACGAGCAGAUG                                  | CAUCUGCAAGUGUUCGU                                   |

| Name | Sequence in hybridized region<br>(crRNA 5' – 3') | Sequence in hybridized region<br>(tracrRNA 5' – 3') |
|------|--------------------------------------------------|-----------------------------------------------------|
| c55  | AGUCAAGACGGAUAA                                  | UUAUCCGAAGUUUGACU                                   |
| c56  | UGUAGGUCACGGAGU                                  | ACUCCGUAAGUCCUACU                                   |
| c57  | AGUACGAUGAGCGGG                                  | CCCGCUCAAGUCGUACU                                   |
| c58  | UAUCUCUAGGAGGGU                                  | ACCCUCCAAGUGAGAAU                                   |
| c59  | CAUAUCCCGGUCCCA                                  | UGGGACCAAGUGAUAAU                                   |
| c60  | AUCCGAGCGGCGGCC                                  | GGCCGCCAAGUUCGGAU                                   |
| c61  | GUCCGUUAUACUCCUG                                 | CAGGAGUAAGUACGGAU                                   |
| c62  | CGUCUGCACCUGUUA                                  | UCAACGGAAGUCAGACU                                   |
| c63  | UUGACGGCAUGUAGG                                  | CCUACAUAAGUCGUCAU                                   |
| c64  | UCUAGGCACCCUAC                                   | GUAGGGGAAGUCCUAGU                                   |
| c65  | GCAUAUCCCUUAAGC                                  | GCUUAAGAAGUAUAUGU                                   |
| c66  | UUUAUACAGGGAGUAC                                 | GUACUCCAAGUGUAUAU                                   |
| c67  | CCCACCCGAAUCAUC                                  | GAUGAUUAAGUGGUGGU                                   |
| c68  | ACCCUGCAGCAGCUU                                  | AACGUCGAAGUCAGGGU                                   |
| c69  | AAGGUCUGACGCCGG                                  | CCGGCGUAAGUGACCUU                                   |
| c70  | UAUGAGACACACGCA                                  | UGCUGUAAGUCUCAUU                                    |
| c71  | CCUUGGCGUCUCUU                                   | AAGCAGAAAGUCCAAGU                                   |
| c73  | CAUGAGGUCGAUAUC                                  | GAUAUCGAAGUCUCAUU                                   |
| c74  | AAUCGGGAGCUGCCU                                  | AGGCAGCAAGUCCGAUU                                   |
| c75  | ACUUUGGUACAGUGA                                  | UCACUGUAAGUCAAAAGU                                  |
| c76  | GUCAGUCUGCUGCGC                                  | GCGCAGCAAGUACUGAU                                   |
| c77  | AUAGAUGUCCUGCGG                                  | CCGCAGGAAGUAUCUAU                                   |
| c78  | GAAUCACAAGAGGCG                                  | CGCCUCUAAGUUGAAUU                                   |
| c79  | AACCAUAGAAACAUU                                  | AAUGUUUAAGUAUGGUU                                   |
| c81  | UCUCAGAGAACCUGA                                  | UCAGGUUAAGUCUGAGU                                   |
| c82  | GUUAACCCCUUCUAA                                  | UUAGAAGAAGUGUUAUU                                   |
| c83  | UUUCACGAUAGUCUU                                  | AAGACUAAGUGUGAAU                                    |
| c84  | GCACACCCGUCGAA                                   | UUCGACCAAGUGUGUGU                                   |
| c85  | AAGUGAGAUUCCGGU                                  | ACCGGAAAAGUUCACUU                                   |

| Name | Sequence in hybridized region<br>(crRNA 5' – 3') | Sequence in hybridized region<br>(tracrRNA 5' – 3') |
|------|--------------------------------------------------|-----------------------------------------------------|
| c86  | GACCGAUCAGCCCUG                                  | CAGGGCUAAGUUCGGUU                                   |
| c87  | CAGUGUUUGCAUCGC                                  | GCGAUGCAAGUACACUU                                   |
| c88  | CGCAGAUGCAUGUAC                                  | GUACAUGAAGUUCUGCU                                   |
| c89  | GGUAGGAAGGCAUCC                                  | GGAUGCCAAGUCCUACU                                   |
| c90  | CCGUCGCGAGCCUUAU                                 | AUAGGCUAAGUCGACGU                                   |
| c91  | GCAUUCGAGUGGCAA                                  | UUGCCACAAGUGAAUGU                                   |
| c92  | UAGUCAACUAGGGGU                                  | ACCCCUAAGUUGACUU                                    |

**Supplementary Table 2: Synthetic RNAs used in CONAN sensor assays**

| Name                 | Sequence in hybridized region                                                              |
|----------------------|--------------------------------------------------------------------------------------------|
| SARS-CoV-II<br>RNA 1 | GCCACUUCUGCUGCUCUUCACCAACCUGAAGAAGAGCAAGAAGAAGAUUGG                                        |
| tracrRNA CoV1        | GGAACCAUUAUUCUUCUUCUUGCAAGUUUCUUUAAGGCUAGUCCGUUAUCAACUUG<br>AAAAAGUGGCACCGAGUCGGUGCUUUUUUU |
| SARS-CoV-II<br>RNA 2 | CAACUUGUAUGAUGUGUUACAAACGUAUAGAGCAACAAGAGUCGAAUGU                                          |
| tracrRNA CoV2        | GGAACCAUUUCGACUCUUGUUGCAAGUUUAUUUAAGGCUAGUCCGUUAUCAACUUG<br>AAAAAGUGGCACCGAGUCGGUGCUUUUUUU |

### Supplementary Table 3: Plasmids used in this study

'dCas9' in this table refers 'dCas9 generator'

'dxCas9' in this table refers 'dxCas9 generator'

'Reporter' in this table refers 'Reporter with sfGFP::ASV tag'

Notes:

- Scars between the parts coming from construction are not shown.
- Circuits in the randomized sequence library are not included in this table.

| Name   | Structure                                                                                                 | Vector  | Reference         |
|--------|-----------------------------------------------------------------------------------------------------------|---------|-------------------|
| pLY54  | dCas9-J23106-PSPFΔHTH::λN22plus-P <sub>pspA</sub> -LEA2B2-Reporter                                        | pSB4A3* | Previous study(1) |
| pLY162 | dCas9-P <sub>rhaB</sub> -PSPFΔHTH::λN22plus-P <sub>pspA</sub> -R1-Reporter                                | pSB4A3* | This study        |
| pLY163 | dCas9-P <sub>rhaB</sub> -PSPFΔHTH::λN22plus-P <sub>pspA</sub> -R2-Reporter                                | pSB4A3* | This study        |
| pLY164 | dCas9-P <sub>rhaB</sub> -PSPFΔHTH::λN22plus-P <sub>pspA</sub> -R3-Reporter                                | pSB4A3* | This study        |
| pLY165 | dCas9-P <sub>rhaB</sub> -PSPFΔHTH::λN22plus-P <sub>pspA</sub> -R2-Reporter-P <sub>pspA</sub> -R2-Reporter | pSB4A3* | This study        |
| pLY166 | dCas9-P <sub>rhaB</sub> -PSPFΔHTH::λN22plus-P <sub>pspA</sub> -R3-Reporter-P <sub>pspA</sub> -R3-Reporter | pSB4A3* | This study        |
| pLY167 | dCas9-P <sub>rhaB</sub> -PSPFΔHTH::λN22plus-P <sub>pspA</sub> -Ar1-Reporter                               | pSB4A3* | This study        |
| pLY168 | dCas9-P <sub>rhaB</sub> -PSPFΔHTH::λN22plus-P <sub>pspA</sub> -Ar2-Reporter                               | pSB4A3* | This study        |
| pLY169 | dxCas9-P <sub>rhaB</sub> -PSPFΔHTH::λN22plus-P <sub>pspA</sub> -LEA2B2-Reporter                           | pSB4A3* | This study        |
| pLY76  | P <sub>lux2</sub> -sgRNA-LEA2                                                                             | p15AC   | Previous study(1) |
| pLY170 | P <sub>lux2</sub> -sgRNA-LEA2-ex2                                                                         | p15AC   | This study        |
| pLY171 | P <sub>lux2</sub> -sgRNA-LEA2-ex3                                                                         | p15AC   | This study        |
| pLY172 | P <sub>lux2</sub> -sgRNA-LEB3-ex2                                                                         | p15AC   | This study        |
| pLY173 | P <sub>lux2</sub> -sgRNA-LEB3-ex3                                                                         | p15AC   | This study        |
| pLY174 | P <sub>lux2</sub> -crRNA-LEA2-WT                                                                          | p15AC   | This study        |
| pLY176 | P <sub>lux2</sub> -crRNA-LEA2-d1                                                                          | p15AC   | This study        |

| Name   | Structure                      | Vector                    | Reference  |
|--------|--------------------------------|---------------------------|------------|
| pLY177 | $P_{lux2}$ -crRNA-LEA2-d2      | p15AC                     | This study |
| pLY178 | $P_{lux2}$ -crRNA-LEA2-d3      | p15AC                     | This study |
| pLY179 | $P_{lux2}$ -crRNA-LEA2-d4      | p15AC                     | This study |
| pLY180 | $P_{lux2}$ -crRNA-LEA2-U1      | p15AC                     | This study |
| pLY181 | $P_{lux2}$ -crRNA-LEA2-U2      | p15AC                     | This study |
| pLY182 | $P_{lux2}$ -crRNA-LEA2-U3      | p15AC                     | This study |
| pLY183 | $P_{lux2}$ -crRNA-LEA2-U4      | p15AC                     | This study |
| pLY184 | $P_{lux2}$ -crRNA-LEA2-U5      | p15AC                     | This study |
| pLY185 | $P_{lux2}$ -mRFP               | p15AC                     | This study |
| pLY186 | $P_{lux2}$ -mRFP- $\Delta$ RBS | p15AC                     | This study |
| pLY187 | $P_{lux2}$ -crRNA-LEA2-U5A     | p15AC                     | This study |
| pLY188 | $P_{lux2}$ -crRNA-LEA2-U5C     | p15AC                     | This study |
| pLY189 | $P_{lux2}$ -crRNA-LEA2-U5T     | p15AC                     | This study |
| pLY190 | $P_{BAD}$ -tracrRNA-WT         | pSEVA221<br>(JX560327)(2) | This study |
| pLY192 | $P_{BAD}$ -tracrRNA-d1         | pSEVA221<br>(JX560327)    | This study |
| pLY193 | $P_{BAD}$ -tracrRNA-d2         | pSEVA221<br>(JX560327)    | This study |
| pLY194 | $P_{BAD}$ -tracrRNA-d3         | pSEVA221<br>(JX560327)    | This study |
| pLY195 | $P_{BAD}$ -tracrRNA-d4         | pSEVA221<br>(JX560327)    | This study |
| pLY196 | $P_{BAD}$ -tracrRNA-U1         | pSEVA221<br>(JX560327)    | This study |
| pLY197 | $P_{BAD}$ -tracrRNA-U2         | pSEVA221<br>(JX560327)    | This study |
| pLY198 | $P_{BAD}$ -tracrRNA-U3         | pSEVA221<br>(JX560327)    | This study |
| pLY199 | $P_{BAD}$ -tracrRNA-U4         | pSEVA221                  | This study |



| Name   | Structure                        | Vector     | Reference  |
|--------|----------------------------------|------------|------------|
|        |                                  | (JX560327) |            |
| pLY200 | P <sub>BAD</sub> -tracrRNA-U5    | pSEVA221   | This study |
|        |                                  | (JX560327) |            |
| pLY201 | P <sub>BAD</sub> -tracrRNA-R1    | pSEVA221   | This study |
|        |                                  | (JX560327) |            |
| pLY202 | P <sub>BAD</sub> -tracrRNA-R2    | pSEVA221   | This study |
|        |                                  | (JX560327) |            |
| pLY203 | P <sub>BAD</sub> -tracrRNA-R3    | pSEVA221   | This study |
|        |                                  | (JX560327) |            |
| pLY204 | P <sub>BAD</sub> -tracrRNA-Ar1   | pSEVA221   | This study |
|        |                                  | (JX560327) |            |
| pLY205 | P <sub>BAD</sub> -tracrRNA-Ar2   | pSEVA221   | This study |
|        |                                  | (JX560327) |            |
| pLY206 | P <sub>BAD</sub> -tracrRNA-R2L1  | pSEVA221   | This study |
|        |                                  | (JX560327) |            |
| pLY207 | P <sub>BAD</sub> -tracrRNA-R2L3  | pSEVA221   | This study |
|        |                                  | (JX560327) |            |
| pLY208 | P <sub>BAD</sub> -tracrRNA-R2L5  | pSEVA221   | This study |
|        |                                  | (JX560327) |            |
| pLY209 | P <sub>BAD</sub> -tracrRNA-R2L7  | pSEVA221   | This study |
|        |                                  | (JX560327) |            |
| pLY210 | P <sub>BAD</sub> -tracrRNA-R2L9  | pSEVA221   | This study |
|        |                                  | (JX560327) |            |
| pLY211 | P <sub>BAD</sub> -tracrRNA-R2L11 | pSEVA221   | This study |
|        |                                  | (JX560327) |            |
| pLY212 | P <sub>BAD</sub> -tracrRNA-R3L1  | pSEVA221   | This study |
|        |                                  | (JX560327) |            |
| pLY213 | P <sub>BAD</sub> -tracrRNA-R3L3  | pSEVA221   | This study |
|        |                                  | (JX560327) |            |
| pLY214 | P <sub>BAD</sub> -tracrRNA-R3L5  | pSEVA221   | This study |

| Name   | Structure                           | Vector     | Reference  |
|--------|-------------------------------------|------------|------------|
|        |                                     | (JX560327) |            |
| pLY215 | P <sub>BAD</sub> -tracrRNA-R3L7     | pSEVA221   | This study |
|        |                                     | (JX560327) |            |
| pLY216 | P <sub>BAD</sub> -tracrRNA-R3L9     | pSEVA221   | This study |
|        |                                     | (JX560327) |            |
| pLY217 | P <sub>BAD</sub> -tracrRNA-R3L11    | pSEVA221   | This study |
|        |                                     | (JX560327) |            |
| pLY218 | P <sub>lux2</sub> -crRNA-R1         | p15AC      | This study |
| pLY219 | P <sub>lux2</sub> -crRNA-R2         | p15AC      | This study |
| pLY220 | P <sub>lux2</sub> -crRNA-R3         | p15AC      | This study |
| pLY221 | P <sub>lux2</sub> -mRNA-Ar          | p15AC      | This study |
| pLY222 | P <sub>lux2</sub> -crRNA-Ar1        | p15AC      | This study |
| pLY223 | P <sub>lux2</sub> -crRNA-Ar2        | p15AC      | This study |
| pLY224 | P <sub>lux2</sub> -crRNA-Ar3        | p15AC      | This study |
| pLY225 | P <sub>lux2</sub> -crRNA-Ar4        | p15AC      | This study |
| pLY226 | P <sub>lux2</sub> -s-crRNA-LEB3     | p15AC      | This study |
| pLY227 | P <sub>lux2</sub> -s-crRNA-LEA2-WT  | p15AC      | This study |
| pLY228 | P <sub>lux2</sub> -s-crRNA-LEA2-C6  | p15AC      | This study |
| pLY229 | P <sub>lux2</sub> -s-crRNA-LEA2-C9  | p15AC      | This study |
| pLY230 | P <sub>lux2</sub> -s-crRNA-LEA2-C48 | p15AC      | This study |
| pLY231 | P <sub>lux2</sub> -s-crRNA-LEA2-C74 | p15AC      | This study |
| pLY232 | P <sub>BAD</sub> -s-tracrRNA- WT    | pSEVA221   | This study |
|        |                                     | (JX560327) |            |
| pLY233 | P <sub>BAD</sub> -s-tracrRNA- C6    | pSEVA221   | This study |
|        |                                     | (JX560327) |            |
| pLY234 | P <sub>BAD</sub> -s-tracrRNA- C9    | pSEVA221   | This study |
|        |                                     | (JX560327) |            |
| pLY235 | P <sub>BAD</sub> -s-tracrRNA- C48   | pSEVA221   | This study |
|        |                                     | (JX560327) |            |
| pLY236 | P <sub>BAD</sub> -s-tracrRNA- C74   | pSEVA221   | This study |

| Name   | Structure                         | Vector     | Reference  |
|--------|-----------------------------------|------------|------------|
|        |                                   | (JX560327) |            |
| pLY237 | P <sub>BAD</sub> -s-tracrRNA- R1  | pSEVA221   | This study |
|        |                                   | (JX560327) |            |
| pLY238 | P <sub>BAD</sub> -s-tracrRNA- R2  | pSEVA221   | This study |
|        |                                   | (JX560327) |            |
| pLY239 | P <sub>BAD</sub> -s-tracrRNA- R3  | pSEVA221   | This study |
|        |                                   | (JX560327) |            |
| pLY240 | P <sub>T7</sub> -CONAN            | pSB1C3**   | This study |
| pLY241 | J23106-s-crRNA-13                 | p15AC      | This study |
| pLY242 | J23106-s-crRNA-12                 | p15AC      | This study |
| pLY243 | J23106-s-crRNA-11                 | p15AC      | This study |
| pLY244 | J23106-s-crRNA-10                 | p15AC      | This study |
| pLY247 | J23106-s-tracrRNA-13              | pSEVA221   | This study |
|        |                                   | (JX560327) |            |
| pLY248 | J23106-s-tracrRNA-12              | pSEVA221   | This study |
|        |                                   | (JX560327) |            |
| pLY249 | J23106-s-tracrRNA-11              | pSEVA221   | This study |
|        |                                   | (JX560327) |            |
| pLY250 | J23106-s-tracrRNA-10              | pSEVA221   | This study |
|        |                                   | (JX560327) |            |
| pLY251 | P <sub>BAD</sub> -s-tracrRNA- Ar2 | pSEVA221   | This study |
|        |                                   | (JX560327) |            |
| pLY245 | P <sub>BAD</sub> -tracrRNA-ESI    | pSEVA221   | This study |
|        |                                   | (JX560327) |            |
| pLY246 | P <sub>lux2</sub> -crRNA-LEB3-WT  | p15AC      | This study |
| pLY252 | P <sub>BAD</sub> -tracrRNA-Ar3    | pSEVA221   | This study |
|        |                                   | (JX560327) |            |
| pLY253 | P <sub>BAD</sub> -tracrRNA-Ar4    | pSEVA221   | This study |
|        |                                   | (JX560327) |            |
| pLY254 | P <sub>BAD</sub> -tracrRNA-WT-21T | pSEVA221   | This study |

| Name   | Structure                                                                        | Vector                 | Reference  |
|--------|----------------------------------------------------------------------------------|------------------------|------------|
|        |                                                                                  | (JX560327)             |            |
| pLY255 | dCas9- P <sub>rhaB</sub> -PSPFΔHTH::λN22plus-<br>P <sub>pspA</sub> -Ar3-Reporter | pSB4A3*                | This study |
| pLY256 | dCas9- P <sub>rhaB</sub> -PSPFΔHTH::λN22plus-<br>P <sub>pspA</sub> -Ar4-Reporter | pSB4A3*                | This study |
| pLY257 | J23106-crRNA-ESI                                                                 | p15AC                  | This study |
| pLY258 | J23106-tracrRNA-ESI                                                              | pSEVA221<br>(JX560327) | This study |

\*<http://parts.igem.org/Part:pSB4A3> (There are a few point mutations)

\*\*<http://parts.igem.org/Part:pSB1C3>

**Supplementary Table 4: Key primers and oligos used in this study**

| <b>Name</b> | <b>Sequence</b>                                                                                            | <b>Purpose</b>                      |
|-------------|------------------------------------------------------------------------------------------------------------|-------------------------------------|
| 23-gRNA-F1  | CTAGAAGTTATTATATAGTTCGGTTCGTTTGAGAGCTAGAAATA<br>GCAAGTTCAAATAAGGCTAGTCCGTTATCAACTTGAAAAAGTG<br>GCACCGAGTCG | For sgRNA-LEA2-ex2/ex3<br>synthesis |
| 23-gRNA-R1  | GCACCGACTCGGTGCCACTTTTTCAAGTTGATAACGGACTAGC<br>CTTATTTGAACTTGCTATTTCTAGCTCTCAAACGACCGAACTA<br>TATAATAA     | For sgRNA-LEA2-ex2/ex3<br>synthesis |
| exBoxB-F2   | GTGCGGGCCCTGAAGAAGGGCCCTAGCAAGTTCAAATAAGGCT<br>AGTCCGTTAT                                                  | For sgRNA-LEA2-ex2<br>synthesis     |
| exBoxB-R2   | GTTGATAACGGACTAGCCTTATTTGAACTTGCTAGGGCCCTTC<br>TTCAGGGCCC                                                  | For sgRNA-LEA2-ex2<br>synthesis     |
| exBoxB-R3   | GCGGCCGCTACTAGTAAAAAAGCACCAGCTCGGTGCCACTT<br>GGGCCCTTCTTCAGGGCCCAA                                         | For sgRNA-LEA2-ex2<br>synthesis     |
| exBoxB-F3   | CAACTTGGGGCCCTGAAGAAGGGCCCAAGTGGCACCAGTTCGGT<br>GCTTTTTTTTACTAGTAGCGGCCGCTGCA                              | For sgRNA-LEA2-ex2<br>synthesis     |
| ex3BoxB-F2  | GTGCGGGCCCTGAAGAAGGGCCCAAGCTAGGGCCCTGAAGAA<br>GGGCCCGCAGGGCCCTGAAGAAGGGCCCTTTTTTTTACTAGTA<br>GCGGCCGCTGCA  | For sgRNA-LEA2-ex3<br>synthesis     |
| ex3BoxB-R2  | GCGGCCGCTACTAGTAAAAAAGGGCCCTTCTTCAGGGCCCT<br>GCGGGCCCTTCTTCAGGGCCCTAGCCTTGGGCCCTTCTTCAGG<br>GCCC           | For sgRNA-LEA2-ex3<br>synthesis     |
| R2L1-F      | CTAGAGGAACCATTCTCGGAGGAGGCCAAGTAGCGTTAAGGCT<br>AGTC                                                        | For tracrRNA-R2L1 synthesis         |
| R2L1-R      | AACGGACTAGCCTTAACGCTACTTGGCCTCCTCCGAGAATGGT<br>TCCT                                                        | For tracrRNA-R2L1 synthesis         |
| R2L3-F      | CTAGAGGAACCATTCTCGGAGGAGGCCAAGTAGCGTTAAGGCTAG<br>TC                                                        | For tracrRNA-R2L3 synthesis         |
| R2L3-R      | AACGGACTAGCCTTAACGCTACTTGGCCTCCTCCGAATGGTTC<br>CT                                                          | For tracrRNA-R2L3 synthesis         |
| R2L5-F      | CTAGAGGAACCATTGAGGAGGCCAAGTAGCGTTAAGGCTAGTC                                                                | For tracrRNA-R2L5 synthesis         |
| R2L5-R      | AACGGACTAGCCTTAACGCTACTTGGCCTCCTCAATGGTTCCT                                                                | For tracrRNA-R2L5 synthesis         |
| R2L7-F      | CTAGAGGAACCATTGGGAGGCCAAGTAGCGTTAAGGCTAGTC                                                                 | For tracrRNA-R2L7 synthesis         |
| R2L7-R      | AACGGACTAGCCTTAACGCTACTTGGCCTCCAATGGTTCCT                                                                  | For tracrRNA-R2L7 synthesis         |
| R2L9-F      | CTAGAGGAACCATTAGGCCAAGTAGCGTTAAGGCTAGTC                                                                    | For tracrRNA-R2L9 synthesis         |
| R2L9-R      | AACGGACTAGCCTTAACGCTACTTGGCCTAATGGTTCCT                                                                    | For tracrRNA-R2L9 synthesis         |
| R2L11-F     | CTAGAGGAACCATTGCCAAGTAGCGTTAAGGCTAGTC                                                                      | For tracrRNA-R2L11 synthesis        |
| R2L11-R     | AACGGACTAGCCTTAACGCTACTTGGCAATGGTTCCT                                                                      | For tracrRNA-R2L11 synthesis        |
| R0L1-F      | CTAGAGGAACCATTCTCGGAGGAGGCCAAGTCCAGCTAAGGCT<br>AGTC                                                        | For tracrRNA-R3L1 synthesis         |
| R0L1-R      | AACGGACTAGCCTTAGCTGGACTTGGCCTCCTCCGAGAATGGT<br>TCCT                                                        | For tracrRNA-R3L1 synthesis         |
| R0L3-F      | CTAGAGGAACCATTCTCGGAGGAGGCCAAGTCCAGCTAAGGCTAG<br>TC                                                        | For tracrRNA-R3L3 synthesis         |
| R0L3-R      | AACGGACTAGCCTTAGCTGGACTTGGCCTCCTCCGAATGGTTC<br>CT                                                          | For tracrRNA-R3L3 synthesis         |
| R0L5-F      | CTAGAGGAACCATTGAGGAGGCCAAGTCCAGCTAAGGCTAGTC                                                                | For tracrRNA-R3L5 synthesis         |
| R0L5-R      | AACGGACTAGCCTTAGCTGGACTTGGCCTCCTCAATGGTTCCT                                                                | For tracrRNA-R3L5 synthesis         |
| R0L7-F      | CTAGAGGAACCATTGGGAGGCCAAGTCCAGCTAAGGCTAGTC                                                                 | For tracrRNA-R3L7 synthesis         |
| R0L7-R      | AACGGACTAGCCTTAGCTGGACTTGGCCTCCAATGGTTCCT                                                                  | For tracrRNA-R3L7 synthesis         |
| R0L9-F      | CTAGAGGAACCATTAGGCCAAGTCCAGCTAAGGCTAGTC                                                                    | For tracrRNA-R3L9 synthesis         |
| R0L9-R      | AACGGACTAGCCTTAGCTGGACTTGGCCTAATGGTTCCT                                                                    | For tracrRNA-R3L9 synthesis         |
| R0L11-F     | CTAGAGGAACCATTGCCAAGTCCAGCTAAGGCTAGTC                                                                      | For tracrRNA-R3L11 synthesis        |
| R0L11-R     | AACGGACTAGCCTTAGCTGGACTTGGCAATGGTTCCT                                                                      | For tracrRNA-R3L11 synthesis        |
| Ar1F        | CTAGAGGAACCATTAGCTGCAATGGCGCAAGTACCGGTAAGGC<br>TAGTC                                                       | For tracrRNA-Ar1 synthesis          |
| Ar1R        | AACGGACTAGCCTTACCGGTAAGTGGCCATTGCAGCTAATGG<br>TTCCCT                                                       | For tracrRNA-Ar1 synthesis          |
| Ar2F        | CTAGAGGAACCATTAATGGTAATGTTGCAAGTATATCTAAGGC<br>TAGTC                                                       | For tracrRNA-Ar2 synthesis          |
| Ar2R        | AACGGACTAGCCTTAGATATACTTGCAACATTACCATTAATGG<br>TTCCCT                                                      | For tracrRNA-Ar2 synthesis          |

| <b>Name</b>          | <b>Sequence</b>                                                                               | <b>Purpose</b>                      |
|----------------------|-----------------------------------------------------------------------------------------------|-------------------------------------|
| SpeI-wt-u5d3T-cr-R   | CGCTACTAGTACAAAACAGCAATCGTCATTTTAGACCGAACTA<br>TATAATAACTTCTAGTTTATTTCG                       | For crRNA-LEA2-U5T<br>synthesis     |
| SpeI-wt-u5d3C-cr-R   | CGCTACTAGTACAAAACAGCAATCGTCATTTTGGACCGAACTA<br>TATAATAACTTCTAGTTTATTTCG                       | For crRNA-LEA2-U5C<br>synthesis     |
| SpeI-wt-u5d3A-cr-R   | CGCTACTAGTACAAAACAGCAATCGTCATTTTGGACCGAACTA<br>TATAATAACTTCTAGTTTATTTCG                       | For crRNA-LEA2-U5A<br>synthesis     |
| XbaI-wt-tracr-F      | CGCTTCTAGAGGAACCAATTCAAAACAGCATAGCAAGTTAAAAT<br>AAGGCTAGTCCGTTATCAACTTG                       | For tracrRNA-WT synthesis           |
| SpeI-wt-cr-R         | CGCTACTAGTACAAAACAGCATAGCTCTAAAACGACCGAACTA<br>TATAATAACTTCTAGTTTATTTCG                       | For crRNA-LEA2-WT<br>synthesis      |
| XbaI-wt-d1-tracr-F   | CGCTTCTAGAGGAACCAATTCAAAACAGCAAAGCAAGTTAAAAT<br>AAGGCTAGTCCGTTATCAACTTG                       | For tracrRNA-d1 synthesis           |
| SpeI-wt-d1-cr-R      | CGCTACTAGTACAAAACAGCAAAGCTCTAAAACGACCGAACTA<br>TATAATAACTTCTAGTTTATTTCG                       | For crRNA-LEA2-d1 synthesis         |
| XbaI-wt-d2-tracr-F   | CGCTTCTAGAGGAACCAATTCAAAACAGCAATGCAAGTTAAAAT<br>AAGGCTAGTCCGTTATCAACTTG                       | For tracrRNA-d2 synthesis           |
| SpeI-wt-d2-cr-R      | CGCTACTAGTACAAAACAGCAATGCTCTAAAACGACCGAACTA<br>TATAATAACTTCTAGTTTATTTCG                       | For crRNA-LEA2-d2 synthesis         |
| SpeI-wt-d3-cr-R      | CGCTACTAGTACAAAACAGCAATCCTCTAAAACGACCGAACTA<br>TATAATAACTTCTAGTTTATTTCG                       | For crRNA-LEA2-d3 synthesis         |
| XbaI-wt-d3-tracr-F   | CGCTTCTAGAGGAACCAATTCAAAACAGCAATCCAAGTTAAAAT<br>AAGGCTAGTCCGTTATCAACTTG                       | For tracrRNA-d3 synthesis           |
| SpeI-wt-d4-cr-R      | CGCTACTAGTACAAAACAGCAATCGTCATAAACGACCGAACTA<br>TATAATAACTTCTAGTTTATTTCG                       | For crRNA-LEA2-d4 synthesis         |
| XbaI-wt-d4-tracr-F   | CGCTTCTAGAGGAACCAATTCAAAACAGCAATCGAAGTTAAAAT<br>AAGGCTAGTCCGTTATCAACTTG                       | For tracrRNA-d4 synthesis           |
| SpeI-wt-d4U1-cr-R    | CGCTACTAGTACAAAACAGCAATCGTCAAAAACGACCGAACTA<br>TATAATAACTTCTAGTTTATTTCG                       | For crRNA-LEA2-U1 synthesis         |
| XbaI-wt-d4U1-tracr-F | CGCTTCTAGAGGAACCAATTCAAAACAGCAATCGAAGTAAAAT<br>AAGGCTAGTCCGTTATCAACTTG                        | For tracrRNA-U1 synthesis           |
| SpeI-wt-d4U2-cr-R    | CGCTACTAGTACAAAACAGCAATCGTCATAAACGACCGAACTA<br>TATAATAACTTCTAGTTTATTTCG                       | For crRNA-LEA2-U2 synthesis         |
| XbaI-wt-d4U2-tracr-F | CGCTTCTAGAGGAACCAATTCAAAACAGCAATCGAAGTATAAAT<br>AAGGCTAGTCCGTTATCAACTTG                       | For tracrRNA-U2 synthesis           |
| SpeI-wt-d4U3-cr-R    | CGCTACTAGTACAAAACAGCAATCGTCATTAACGACCGAACTA<br>TATAATAACTTCTAGTTTATTTCG                       | For crRNA-LEA2-U3 synthesis         |
| XbaI-wt-d4U3-tracr-F | CGCTTCTAGAGGAACCAATTCAAAACAGCAATCGAAGTATTAAT<br>AAGGCTAGTCCGTTATCAACTTG                       | For tracrRNA-U3 synthesis           |
| SpeI-wt-d4U4-cr-R    | CGCTACTAGTACAAAACAGCAATCGTCATTTACGACCGAACTA<br>TATAATAACTTCTAGTTTATTTCG                       | For crRNA-LEA2-U4 synthesis         |
| XbaI-wt-d4U4-tracr-F | CGCTTCTAGAGGAACCAATTCAAAACAGCAATCGAAGTATTTAT<br>AAGGCTAGTCCGTTATCAACTTG                       | For tracrRNA-U4 synthesis           |
| SpeI-wt-d4U5-cr-R    | CGCTACTAGTACAAAACAGCAATCGTCATTTTCGACCGAACTA<br>TATAATAACTTCTAGTTTATTTCG                       | For crRNA-LEA2-U5 synthesis         |
| XbaI-wt-d4U5-tracr-F | CGCTTCTAGAGGAACCAATTCAAAACAGCAATCGAAGTATTTTT<br>AAGGCTAGTCCGTTATCAACTTG                       | For tracrRNA-U5 synthesis           |
| XbaI-R1-PspA         | CGCTTCTAGAGCCCAGGACTCCTCACTTCAGCGGTTAGTGTA<br>TTTCGCTAACTCATCCTGGC                            | For P <sub>pspA</sub> -R1 synthesis |
| XbaI-R2-PspA         | CGCTTCTAGAGTAATGCAGAAGAAGACCATGCGGTTAGTGTA<br>TTTCGCTAACTCATCCTGGC                            | For P <sub>pspA</sub> -R2 synthesis |
| XbaI-R3-PspA         | CGCTTCTAGAGTGAAGGACGGCGCCACTACCGGTTAGTGTA<br>TTTCGCTAACTCATCCTGGC                             | For P <sub>pspA</sub> -R3 synthesis |
| XbaI-R1-tra          | CGCTTCTAGAGGAACCAATTCCTTGTAGATGAACAAGTCCGTT<br>AAGGCTAGTCCGTTATCAACTTG                        | For tracrRNA-R1 synthesis           |
| XbaI-R2-tra          | CGCTTCTAGAGGAACCAATTCCTCGGAGGAGGCCAAGTCCAGCT<br>AAGGCTAGTCCGTTATCAACTTG                       | For tracrRNA-R2 synthesis           |
| XbaI-R3-tra          | CGCTTCTAGAGGAACCAATTAGTGGTCTTGACCAAGTAGCGTT<br>AAGGCTAGTCCGTTATCAACTTG                        | For tracrRNA-R3 synthesis           |
| XP- L3S3P22-F        | CTAGAGCCAATTATTGAAGCCGCTAACCGCGCCTTTTTTTGT<br>TTCTGGTCTCCCTACTAGTAGCGGCCGCTGCA                | For terminator L3S3P22<br>synthesis |
| XP- L3S3P22-R        | GCGGCCGCTACTAGTAGGAGACCAGAAACAAAAAAGGCCGC<br>GTTAGCGCCTTCAATAATTGGCT                          | For terminator L3S3P22<br>synthesis |
| XP-L3S2P21-F         | CTAGAGCTCGGTACCAAATTCAGAAAAGAGGCCTCCCGAAAG<br>GGGGCCCTTTTTCTGTTTTGGTCTACTAGTAGCGGCCGCTGC<br>A | For terminator L3S2P21<br>synthesis |
| XP-L3S2P21-R         | GCGGCCGCTACTAGTAGGACAAAACGAAAAAAGGCCCCCTT<br>TCGGGAGGCCTTTTTCTGGAATTTGGTACCGAGCT              | For terminator L3S2P21<br>synthesis |
| PS1 (2)              | AGGGCGCGGATTTGTCC                                                                             | For sequencing                      |
| PS2 (2)              | GCGGCAACCGAGCGTTC                                                                             | For sequencing                      |

| <b>Name</b> | <b>Sequence</b>                 | <b>Purpose</b> |
|-------------|---------------------------------|----------------|
| VF2*        | TGCCACCTGACGTCTAAGAA            | For sequencing |
| VR**        | ATTACCGCCTTTGAGTGAGC            | For sequencing |
| CF2         | GTTTCGTAAGCCATTTCCGCTCGCCGCAGTC | For sequencing |
| CR          | AACGGTCTGGTTATAGGTACATTGAGCAAC  | For sequencing |

\* [http://parts.igem.org/wiki/index.php?title=Part:BBa\\_G00100](http://parts.igem.org/wiki/index.php?title=Part:BBa_G00100)

\*\* [http://parts.igem.org/wiki/index.php?title=Part:BBa\\_G00101](http://parts.igem.org/wiki/index.php?title=Part:BBa_G00101)

**Supplementary Table 5: Sequences for inducible promoters used in this study**

| Name                    | Type and source                                            | Parts                      | DNA sequence (5'– 3')                                                                                                                                                                                                                                                                                                                                                                                                                                                                                                                                                                                                                                                                                                                                                                                                                                                                                                                                                     |
|-------------------------|------------------------------------------------------------|----------------------------|---------------------------------------------------------------------------------------------------------------------------------------------------------------------------------------------------------------------------------------------------------------------------------------------------------------------------------------------------------------------------------------------------------------------------------------------------------------------------------------------------------------------------------------------------------------------------------------------------------------------------------------------------------------------------------------------------------------------------------------------------------------------------------------------------------------------------------------------------------------------------------------------------------------------------------------------------------------------------|
| <i>P<sub>BAD</sub></i>  | Inducible promoter<br><br>Composite Module<br>(This study) | Reverse Terminator L3S2P11 | CCTAGTTGTCTTCATGCATGAAGACAAAATTAATACTAGAGGGACCAAAA<br>CGAAAAAAGACGCTCGAAAGCGTCTCTTTTCTGGAATTTGGTACCGAGCT<br>CTAGTA                                                                                                                                                                                                                                                                                                                                                                                                                                                                                                                                                                                                                                                                                                                                                                                                                                                        |
|                         |                                                            | Reverse <i>araC</i> CDS    | TTATGACAACCTTGACGGCTACATCATTCACTTTTTTCTTCACAACCGGCAC<br>GGAACCTCGCTCGGGCTGGCCCCGGTGCATTTTTTAAATACCCGCGAGAAA<br>TAGAGTTGATCGTCAAACCAACATTGCGACCGACGGTGGCGATAGGCAT<br>CCGGTGGTGTCTAAAAGCAGCTTCGCCTGGCTGATACGTTGGTCCCTCGC<br>GCCAGCTTAAGACGCTAATCCCTAACTGCTGGCGGAAAAGATGTGACAGA<br>CGCGACGGCGACAAGCAAACATGCTGTGCGACGCTGGCGATATCAAAT<br>GCTGTCTGCCAGGTGATCGCTGATGTACTGACAAGCCTCGCGTACCCGAT<br>TATCCATCGGTGGATGGAGCGACTCGTTAATCGCTTCCATGCGCCGAGT<br>ACAATTGCTCAAGCAGATTTATCGCCAGCAGCTCCGAATAGCGCCCTTC<br>CCCTTGCCCGGCTTAATGATTTGCCAAACAGGTCGCTGAAATGCGGCT<br>GGTGCCTTCATCCGGGCGAAAGAACCCCGTATTGGCAAATATTGACGGC<br>CAGTTAAGCCATTCATGCCAGTAGGCGCGGGACGAAAGTAAACCCACTG<br>GTGATACCATTGCGGAGCCTCCGGATGACGACCGTAGTGATGAATCTCTC<br>CTGGCGGGAACAGCAAATATCACCCGGTCGGCAAACAAATTTCTCGTCCC<br>TGATTTTTACCACCCCTGACCGGAATGGTGAAGATTGAGAATATAACC<br>TTTCATTCCCAGCGGTGCGTCGATAAAAAAATCGAGATAACCGTTGGCCT<br>CAATCGGCGTTAAACCCGCCACCAGATGGGCATTAACGAGTATCCCGGC<br>AGCAGGGGATCATTTTGGCTTCAGCCAT |
|                         |                                                            | <i>P<sub>BAD</sub></i>     | ACTTTTCATACTCCCGCCATTTCAGAGAAGAAACCAATTGTCCATATTGCA<br>TCGACATTGCCGTCCTGCGTCTTTTACTGGCTCTTCTCGCTAACCAAAA<br>CCGGTAACCCCGCTTATTAAGCATTCTGTAAACAAAGCGGGACCAAAAGC<br>CATGACAAAAACGCGTAACAAAAGTGTCTATAATCAGCGGCAAAAAGTCC<br>ACATTGATTATTTGCACGGCGTCACACTTTGCTATGCCATAGCATTTTTTA<br>TCCATAAGATTAGCGGATCCTACCTGACGCTTTTTTATCGCAACTCTCTAC<br>TGTTTCTCCAT <sub>A</sub><br>(TTS)                                                                                                                                                                                                                                                                                                                                                                                                                                                                                                                                                                                                   |
| <i>P<sub>lux2</sub></i> | Inducible promoter<br><br>Composite Module<br>(This study) | Reverse Terminator L3S2P55 | CCTAGTTGTCTTCATGCATGAAGACAAAATTAATACTAGAGGGACCAAAA<br>CGAAAAAAGACGCTTTTTCAGCGTCTTATTGTTGCTCTTTGGTACCGAGCT<br>CTAGTAGTGATCTACACTAGCACTATCAGTG                                                                                                                                                                                                                                                                                                                                                                                                                                                                                                                                                                                                                                                                                                                                                                                                                              |
|                         |                                                            | Reverse <i>luxR</i> CDS    | TTATTAATTTTTTAAAGTATGGGCAATCAATTGCTCCTGTTAAAATTGCTT<br>TAGAAATACTTTGGCAGCGGTTTGTGTTGATTGAGTTTCATTTGCGCATTG<br>GTTAAATGGAAAGTGACAGTACGCTCACTGCAACCTAATATTTTTGAAAT<br>ATCCCAAGAGCTTTTTCTTCGCATGCCACGCTAAACATTCTTTTTTCTC<br>TTTTGGTTAAATCGTTGTTGATTTATTATTTGCTATATTTATTTTTTCGA<br>TAAAATAAACTATCTATATAGTTGTCTTTTTCTGAATGTGCAAAACTAA<br>GCATTCCGAAGCCATTGTTAGCCGTATGAATAGGGAAAATAACCCAGTG<br>ATAAGACCTGATGTTTTCGCTTCTTAAATTACATTTGGAGATTTTTTATT<br>TACAGCATTGTTTTCAAATATATCCAATTAATTGGTGAATGATTGGAGT<br>TAGAATAATCTACTATAGGATCATATTTTATTAATTAGCGTCATCATAA<br>TATTGCCTCCATTTTTTAGGGTAATTATCTAGGATTGAAATATCAGATTT<br>AACCATAGAATGAGGATAAATGATCGCGAGTAAATAATATTCACAATGTA<br>CCATTTTAGTCATATCAGATAAGCATTGATTAATATCATTATTGCTTCTA<br>CAAGCTTTAATTTTATTAATTATCTGTATGTGTCGTCGGCATTATGTT<br>TTTCAT                                                                                                                                                                                     |
|                         |                                                            | Reverse RBS B0030          | <a href="#">CTAGTATTTCTCCTCTTTAATCTCTAGTA</a><br>( <a href="#">Scar/Spacer</a> )                                                                                                                                                                                                                                                                                                                                                                                                                                                                                                                                                                                                                                                                                                                                                                                                                                                                                          |
|                         |                                                            | Reverse J23117             | GCTAGACAATCCCTAGGACTGAGCTAGCTGTCAA <a href="#">TCACACT</a><br>( <a href="#">Scar/Spacer</a> )                                                                                                                                                                                                                                                                                                                                                                                                                                                                                                                                                                                                                                                                                                                                                                                                                                                                             |
|                         |                                                            | T7Te Terminator            | GGCTCACCTTCGGGTGGGCCTTTCTGCG                                                                                                                                                                                                                                                                                                                                                                                                                                                                                                                                                                                                                                                                                                                                                                                                                                                                                                                                              |



| Name                    | Type and source               | Parts                      | DNA sequence (5'– 3')                                                                                                                                                                                                                                                                                                                                                                                                                                                                                                                                                                                                                                                                                                                                                                                                                                                                                                            |
|-------------------------|-------------------------------|----------------------------|----------------------------------------------------------------------------------------------------------------------------------------------------------------------------------------------------------------------------------------------------------------------------------------------------------------------------------------------------------------------------------------------------------------------------------------------------------------------------------------------------------------------------------------------------------------------------------------------------------------------------------------------------------------------------------------------------------------------------------------------------------------------------------------------------------------------------------------------------------------------------------------------------------------------------------|
|                         |                               | <i>P<sub>lux2</sub></i>    | <a href="#">TTTATATACTAG</a> AGACCTGTAGGATCGTACAGGTTTACGCAAGAAAATGG<br>TTTGTACTTTTCGAATAAAA<br>( <a href="#">TTS</a> , <a href="#">Scar/Spacer</a> )                                                                                                                                                                                                                                                                                                                                                                                                                                                                                                                                                                                                                                                                                                                                                                             |
| <i>P<sub>rhaB</sub></i> | Inducible promoter            | Reverse Terminator L3S2P55 | CCTAGTTGTCTTCATGCATGAAGACAAAATTAATACTAGAGGGACCAAAA<br>CGAAAAAAGACGCTTTTCAGCGTCTTATTGTTTCGCTTTTGGTACCGAGCT<br>AGTA                                                                                                                                                                                                                                                                                                                                                                                                                                                                                                                                                                                                                                                                                                                                                                                                                |
|                         | Composite Module (This study) | Reverse <i>rhaS</i> CDS    | TTATTGCAGAAAGCCATCCCGTCCCTGGCGAATATCACGCGGTGACCAGT<br>TAAACTCTCGGGCAAAAAGCGTCGAAAAGTGGTTACTGTGCGTGAATCCA<br>CAGCGATAGGCGATGTCAGTAACGCTGGCCTCGCTGTGGCGTAGCAGATG<br>TCGGGCTTTTCATCAGTCGCAGGCGGTTTCCAGGTATCGCTGAGGCGTCAGTC<br>CCGTTTGCTGCTTAAGCTGCCGATGTAGCGTACGCAAGTAAAGAGAAAAT<br>TGATCCGCCACGGCATCCCAATTCACCTCATCGGCAAAAATGGTCCCTCCAG<br>CCAGGCCAGAAGCAAGTTGAGACGTGATGCGCTGTTTCCAGGTTCTCCT<br>GCAAACGCTTTTACGCAGCAAGAGCAGTAATTGCATAAACAAAGATCTCG<br>CGACTGGCGGTGAGGGTAAATCATTTCCTTCTGCTGTTCCATCTG<br>TGCAACCAGCTGTCGCACCTGCTGCAATACGCTGTTTAAACGCGCCAGT<br>GAGACGGATACTGCCATCCAGCTCTTGTGGCAGCAACTGATTACGCCCCG<br>GCGAGAAACTGAAATCGATCCGGCGAGCGATACAGCACATTGGTCAGACA<br>CAGATTATCGGTATGTTTCATACAGATGCCGATCATGATCGCGTACGAAAC<br>AGACCGTGCCACCGGTGATGGTATAGGGTGCCATTAAACACATGAATA<br>CCCGTGCCATGTTTCGACAATCACAATTTTCATGAAAATCATGATGATGTTT<br>AGGAAAATCCGCTGCGGGAGCCGGGTTCTATCGCCACGGACGCGTTAC<br>CGGACGCAAAAATCCACACTATGTAATACGGTCAT |
|                         |                               | Reverse J23101-RBS         | <a href="#">TTGGGCTCCCTCTAGTA</a> GCTAGCATAATACCTAGGACTGAGCTAGCTGTA<br><a href="#">AACTCTAGTATCACACT</a><br>( <a href="#">Scar/Spacer</a> )                                                                                                                                                                                                                                                                                                                                                                                                                                                                                                                                                                                                                                                                                                                                                                                      |
|                         |                               | T7Te Terminator            | GGCTCACCTTCGGGTGGGCCTTTCTGCGT <a href="#">TTTATATACTAGAGAGACCTTT</a><br><a href="#">ACGCCGCTGGAGCAGGAATGCGGTGAGCATCACAT</a><br>( <a href="#">Scar/Spacer</a> )                                                                                                                                                                                                                                                                                                                                                                                                                                                                                                                                                                                                                                                                                                                                                                   |
|                         |                               | <i>P<sub>rhaB</sub></i>    | CACCACAATTCAGCAAATTTGTGAACATCATCACGTTTCATCTTTCCCTGGT<br>TGCCAATGGCCATTTTCCTGTCAGTAACGAGAAGGTCGCGAATTGAGGC<br>GCTTTTACTGGTCGTA <u>A</u><br>( <a href="#">TTS</a> )                                                                                                                                                                                                                                                                                                                                                                                                                                                                                                                                                                                                                                                                                                                                                                |

**Supplementary Table 6: Sequences for dCas9/dxCas9 generator**

| Name            | Type and source               | Parts                          | DNA sequence (5'-3')                                                                                                                                                                                                                                                                                                                                                                                                                                                                                                                                                                                                                                                                                                                                                                                                                                                                                                                                                                                                                                                                                                                                                                                                                                                                                                                                                                                                                                                                                                                                                                                                                                                                                                                                                                                                                                                                                                                                                                                                                                                                                                                                                                                                                                                                                                                                                                                                                                                                                                                                                                                                                                                                                                                                                                                                                                                                                                                                                                                                                                                                                                                                                                                                                                                                                                                                                                                                                                                                                                                                                                                                                                                                                                                                                                                                                                                                                                                                                                                                                                                                    |
|-----------------|-------------------------------|--------------------------------|-----------------------------------------------------------------------------------------------------------------------------------------------------------------------------------------------------------------------------------------------------------------------------------------------------------------------------------------------------------------------------------------------------------------------------------------------------------------------------------------------------------------------------------------------------------------------------------------------------------------------------------------------------------------------------------------------------------------------------------------------------------------------------------------------------------------------------------------------------------------------------------------------------------------------------------------------------------------------------------------------------------------------------------------------------------------------------------------------------------------------------------------------------------------------------------------------------------------------------------------------------------------------------------------------------------------------------------------------------------------------------------------------------------------------------------------------------------------------------------------------------------------------------------------------------------------------------------------------------------------------------------------------------------------------------------------------------------------------------------------------------------------------------------------------------------------------------------------------------------------------------------------------------------------------------------------------------------------------------------------------------------------------------------------------------------------------------------------------------------------------------------------------------------------------------------------------------------------------------------------------------------------------------------------------------------------------------------------------------------------------------------------------------------------------------------------------------------------------------------------------------------------------------------------------------------------------------------------------------------------------------------------------------------------------------------------------------------------------------------------------------------------------------------------------------------------------------------------------------------------------------------------------------------------------------------------------------------------------------------------------------------------------------------------------------------------------------------------------------------------------------------------------------------------------------------------------------------------------------------------------------------------------------------------------------------------------------------------------------------------------------------------------------------------------------------------------------------------------------------------------------------------------------------------------------------------------------------------------------------------------------------------------------------------------------------------------------------------------------------------------------------------------------------------------------------------------------------------------------------------------------------------------------------------------------------------------------------------------------------------------------------------------------------------------------------------------------------------|
| dCas9 generator | Composite Module (This study) | BioBrick Prefix                | GAATTCGCGGCCGCTTCTAGAG                                                                                                                                                                                                                                                                                                                                                                                                                                                                                                                                                                                                                                                                                                                                                                                                                                                                                                                                                                                                                                                                                                                                                                                                                                                                                                                                                                                                                                                                                                                                                                                                                                                                                                                                                                                                                                                                                                                                                                                                                                                                                                                                                                                                                                                                                                                                                                                                                                                                                                                                                                                                                                                                                                                                                                                                                                                                                                                                                                                                                                                                                                                                                                                                                                                                                                                                                                                                                                                                                                                                                                                                                                                                                                                                                                                                                                                                                                                                                                                                                                                                  |
|                 |                               | Reverse Terminator L3S3P00     | GGGAGACCAGAAACAAAAAAGGGGAGCGGTTTCCCGCTCCCCTTCAATAATTGG                                                                                                                                                                                                                                                                                                                                                                                                                                                                                                                                                                                                                                                                                                                                                                                                                                                                                                                                                                                                                                                                                                                                                                                                                                                                                                                                                                                                                                                                                                                                                                                                                                                                                                                                                                                                                                                                                                                                                                                                                                                                                                                                                                                                                                                                                                                                                                                                                                                                                                                                                                                                                                                                                                                                                                                                                                                                                                                                                                                                                                                                                                                                                                                                                                                                                                                                                                                                                                                                                                                                                                                                                                                                                                                                                                                                                                                                                                                                                                                                                                  |
|                 |                               | Reverse Standardized dCas9 CDS | <p><b>CTCTAGTA</b>TTAGTCACCTCCTAGCTGACTCAAATCAATGCGTGTTTCATAAAG<br/>           ACCAGTGATGGATTGATGGATAAGAGTGGCATCTAAAACCTCTTTTGTAGACG<br/>           TATATCGTTTACGATCAATTGTTGTATCAAAATATTTAAAAGCAGCGGGAGCT<br/>           CCAAGATTCTGCAACGTAAATAAATGAATAATATTTTCTGCTGTTCACGTAT<br/>           TGGTTTGTCTCTATGTTTGTATATGACTAAGAAGCTTATCTAAATTGGCAT<br/>           CTGCTAAAATAACACGCTTAGAAAATTCACGTATTGCTCAATAATCTCATCT<br/>           AAATAATGCTTATGCTGCTCCACAAACAATTGTTTTGTTTCGTTATCTTCTGG<br/>           ACTACCCCTCAACTTTTTCATAATGACTAGCTAAATATAAAAAATTCACATATT<br/>           TGCTTGGCAGAGCCAGCTCATTTCCTTTTTGTAATTCTCCGGCACTAGCCAGC<br/>           ATCCGTTTACGACCGTTTTCTAACTCAAAAAGACTATATTTAGGTAGTTTAAAT<br/>           GATTAAGTCTTTTTTAACCTCCTTATATCCTTTAGCTTCTAAAAAGTCAATCG<br/>           GATTTTTTCAAAGGAACCTCTTCCATAATTGTGATCCCTAGTAACTCTTTA<br/>           ACGGATTTAACTTCTTCGATTTCCCTTTTTCCACCTTAGCAACCAGTACGGAC<br/>           TGAATAAGCTACCGTTGGACTATCAAAACCACCATATTTTTTGGATCCCGAGT<br/>           CTTTTTACGAGCAATAAGCTTGTCCGAATTTCTTTTTGGTAAAATTGACTCC<br/>           TTGGAGAATCCGCTGTCTGTACTTCTGTTTTCTTGACAATATGACTTGGGG<br/>           CATGGACAATACTTTGCGCACTGTGGCAAAATCTCGCCCTTTATCCCAGACAA<br/>           TTTCTCCAGTTTCCCATTAGTTTCGATTAGAGGGCGTTTGGCAATCTCTCCA<br/>           TTTGCAAGTGTAATTTCTGTTTTGAAGAAGTTCATGATATTAGAGTAAAAGAA<br/>           ATATTTTGGCGTTGCTTTGCCTATTTCTTGCTCAGACTTAGCAATCAATTTTAC<br/>           GAACATCATAAACTTTATAATCACCATAGACAAACTCCGATTCAGATTTTGGGA<br/>           TATTTCTTAATCAAAGCAGTTCCAACGACGGCATTAGATACGCATCATGGGC<br/>           ATGATGGTAATTGTTAATCTCACGTACTTTATAGAATTGGAATCTTTTCGGA<br/>           AGTCAGAACTAATTTAGATTTTAAGGTAATCACTTTAACCTCTCGAATAAGT<br/>           TTATCATTTTCATCGTATTTAGTATTCATGCGACTATCCAAAATTTGTGCCAC<br/>           ATGCTTAGTGATTTGGCGAGTTTCAACCAATTTGGCGTTTGATAAAAACAGCTT<br/>           TATCAAGTTTCACTCAAACCTCCACGTTTCAGCTTTTCGTTAAATTTCAAACTTA<br/>           CGTTGAGTGATTAACCTTGGCGTTTAGAAGTTGTCTCCAATAGTTTTTTCATCTT<br/>           TTTGACTACTTCTTCACTTGGAACGTTATCCGATTTACCACGATTTTTTATCAG<br/>           AACGCGTTAAGACCTTATTGCTATTGAATCGTCTTTAAGGAACTTTGTGGA<br/>           ACAATGGCATCGACATCATAATCACTTAAACGATTAATATCTAATTTCTGGTC<br/>           CACATACATGTCTCTCCATTTTGGAGATAATAGAGATAGAGCTTTTTCATTTT<br/>           GCAATTGAGTATTTTCAACAGGATGCTCTTTAAGAATGACTTCTTCAATCTT<br/>           TTGATACCTTCTCGATTCGTTTTCATACGCTCTCGCGAATTTTCTGGCCCTT<br/>           TTGAGTTGTCTGATTTTTCAGTGCCATTTCAATAACGATATTTTCTGGCTTAT<br/>           GCCGCCCATTACTTTGACCAATTCATCAACAACCTTTTACAGTCTGTAAAATA<br/>           CCTTTTTTAAATAGCAGGGCTACCAGCTAAATTTGCAATATGTTTCATGTAACCT<br/>           ATCGCCTTGTCCAGACACTTGTGCTTTTTGAATGTCTTCTTTAAATGTCAAAC<br/>           TATCATCATGGATCAGCTGCATAAAATTGGGATTGGCAAAACCATCTGATTTT<br/>           AAAAAATCTAATATTGTTTTTCCAGATTGCTTATCCCTAATACCATTAATCAA<br/>           TTTTTCGAGACAAACGTCCCAACAGTATAACGGCGACGTTTAAAGCTGTTTCA<br/>           TCACCTTATCATCAAAGAGGTGAGCATATGTTTTAAGTCTTTCCTCAATCATC<br/>           TCCCTATCTTCAAATAAGGTCATGTTAAAACAATATCCTCTAAGATATCTTC<br/>           ATTTTCTTCAATATCCAAAAATCTTTATCTTTAATAATTTTAGCAAATCAT<br/>           GGTAGGTACCTAATGAAGCATTAAATCTATCTTCAACTCCTGAAATTTCAACA<br/>           CTATCAAACATTTCTATTTTTTGAATAAATCTTCTTTTAAATGCTTTAACGGT<br/>           TACTTTTTCGATTTGTTTTGAAGAGTAAATCAACAATGGCTTTCTTCTGTTCAC<br/>           CTGAAAGAAATGCTGGTTTTTCGATTCCTTCAGTAACATATTTGACCTTTGTC<br/>           AATTCGTTATAAACCGTAAAATACTCATAAAGCAAACATATGTTTTGGTAGTAC<br/>           TTTTTTCATTTGGAAGATTTTTATCAAAGTTTGTTCATGCGTTCAATAAATGATT<br/>           GAGCTGAAGCACCTTTATCGACAACCTTCTTCAAATTCATGGGGTAATTTGTT<br/>           TCTTCAGACTTCCGAGTCATCCATGCAAAACGACTATTGCCACGCGCCAATGG<br/>           ACCAACATAATAAGGAATACGAAAAGTCAAGATTTTTTCAAATCTTCTCACGAT<br/>           TGTCTTTTTAAAATGGATAAAAAGTCTTCTTGTCTTCTCAAATAGCATGCAGC<br/>           TCACCCAAGTGAATTTGATGGGGAATAGAGCCGTTGTCAAAGTCCGTTGCTT<br/>           GCGCAGCAAATCTTACGATTTAGTTTCCCAATAATTCCTCAGTACCATCCA<br/>           TTTTTTCTAAAATTTGGTTTGATAAATTTATAAAAATTTCTTCTGGCTAGCTCCC</p> |

| Name                | Type and source                     | Parts                                 | DNA sequence (5'-3')                                                                                                                                                                                                                                                                                                                                                                                                                                                                                                                                                                                                                                                                                                                                                                                                                                                                                                                                                                                                                                                                                                                                                                                                                                          |
|---------------------|-------------------------------------|---------------------------------------|---------------------------------------------------------------------------------------------------------------------------------------------------------------------------------------------------------------------------------------------------------------------------------------------------------------------------------------------------------------------------------------------------------------------------------------------------------------------------------------------------------------------------------------------------------------------------------------------------------------------------------------------------------------------------------------------------------------------------------------------------------------------------------------------------------------------------------------------------------------------------------------------------------------------------------------------------------------------------------------------------------------------------------------------------------------------------------------------------------------------------------------------------------------------------------------------------------------------------------------------------------------|
|                     |                                     |                                       | CCATCAATATAAACCCTGCATATCCGTTTTTTTGGATTGATCAAAAAAGATTTCTTT<br>ATACTTTTCTGGAAGTTGTTGTCGAACTAAAGCTTTTAAAAGAGTCAAGTCTT<br>GATGATGTTTCATCGTAGCGTTTAAATCATTGAAGCTGATAGGGGAGCCTTAGTT<br>ATTTTCAGTATTTACTCTTAGGATATCTGAAAGTAAAATAGCATCTGATAAAT<br>CTTAGCTGCCAAAAACAATCAGCATATTGATCTCCAATTTGCGCCAATAAAT<br>TATCTAAATCATCATCGTAAGTATCTTTTGAAGCTGTAATTTAGCATCTTCT<br>GCCAAATCAAATTTGATTTAAAATTAGGGGTCAAACCCAATGACAAAGCAAT<br>GAGATTCCCAAATAAGCCATTTTCTTCTCACCGGGGAGCTGAGCAATGAGAT<br>TTTCTAATCGTCTTGATTTACTCAATCGTGCAGAAAGAATCGCTTTAGCATCT<br>ACTCCACTTCGCTTAATAGGGTTTTCTTCAAATAATTGATTGAGGTTTGTAC<br>CAACTGGATAAATAGTTTGTCCACATCACTATTATCAGGATTTAAATCTCCCT<br>CAATCAAAAAATGACCACGAACTTAATCATATGCGCTAAGGCCAAATAGATT<br>AAGCGCAAATCCGCTTTATCAGTAGAATCTACCAATTTTTTTCGCAGATGATA<br>GATAGTTGGATATTTCTCATGATAAGCAACTTCATCTACTATATTTCCAAAAA<br>TAGGATGACGTTTCATGCTTCTGTCTTCTCCACCAAAAAAGACTCTTCAAGT<br>CGATGAAAGAACTATCATCTACTTTCCGCATCTCATTTGAAAAAATCTCCTG<br>TAGATAACAATACGATTCTCCGACGTGTATACCTTCTACGAGCTGTCCGTT<br>TGAGGCGAGTCGCTTCCGCTGTCTCTCCACTGTCAAATAAAAGAGCCCCTATA<br>AGATTTTTTTTGATACTGTGGCGGTCTGTATTTCCAGAACCTTGAACTTTTT<br>AGACGGAACCTTATATTCATCAGTGATCACCGCCCATCCGACGCTATTTGTGC<br>CGATAGCTAAGCCTATTGAGTATTTCTTATCCAT<br>( <u>Scar/Spacer</u> , <u>mutation</u> ) |
|                     |                                     | Reverse RBS<br>B0034                  | <u>AGATCC</u> TTTTCTCCTCTTT<br>( <u>Scar/Spacer</u> )                                                                                                                                                                                                                                                                                                                                                                                                                                                                                                                                                                                                                                                                                                                                                                                                                                                                                                                                                                                                                                                                                                                                                                                                         |
|                     |                                     | <i>tetR/tetA</i><br>promoters         | AGATCTTTTCAATTCTTTTCTCTATCACTGATAGGGAGTGGTAAAATAACTCT<br>ATCAACGATAGAGTGTCAACAAAAATTAGGAATTAATG<br>( <u>mutation</u> )                                                                                                                                                                                                                                                                                                                                                                                                                                                                                                                                                                                                                                                                                                                                                                                                                                                                                                                                                                                                                                                                                                                                        |
|                     |                                     | <i>tetR</i> CDS                       | ATGTCAGATTAGATAAAAAGTAAAGTGATTAACAGCGCATTAGAGCTGCTTAA<br>TGAGGTCCGAATCGAAGGTTTAAACAACCCGTAAACTCGCCAGAAAGCTAGGTG<br>TAGAGCAGCCTACATTGTATTGGCATGTAAAAATAAGCGGGCTTTGCTCGAC<br>GCCTTAGCCATTGAGATGTTAGATAGGCACCATACTCACTTTTGCCTTTTGA<br>AGGGGAAAGCTGGCAAGATTTTTTACGTAATAACGCTAAAAGTTTTAGATGTG<br>CTTTACTAAGTCATCGCGATGGAGCAAAAGTACATTTAGGTACAGGCCTACA<br>GAAAAACAGTATGAAACTCTCGAAAATCAATTAGCCTTTTTTATGCCAACAAGG<br>TTTTTCCTAGAGAATGCATTATATGCACTCAGCGCTGTGGGGCATTTTACTT<br>TAGGTTGCGTATTGGAAGATCAAGAGCATCAAGTCGCTAAAGAAGAAAGGGAA<br>ACACCTACTACTGATAGTATGCCGCCATTATTACGACAAGCTATCGAATTATT<br>TGATCACCAGGTGCAGAGCCAGCCTTCTTATTCGGCCTTGAATTGATCATAT<br>GCGGATTAGAAAAACAACTTAAATGTGAAAGTGGGTCTTAA<br>( <u>mutation</u> )                                                                                                                                                                                                                                                                                                                                                                                                                                                                                                                                              |
|                     |                                     | Terminator<br>L3S3P22                 | <u>TACTAGAG</u> CCAATTATTGAAGCCGCTAACCGCGCCTTTTTTTGTTTTCTGGTC<br>TCCC<br>( <u>Scar/Spacer</u> )                                                                                                                                                                                                                                                                                                                                                                                                                                                                                                                                                                                                                                                                                                                                                                                                                                                                                                                                                                                                                                                                                                                                                               |
|                     |                                     | BioBrick<br>Suffix                    | TACTAGTAGCGGCCGCTGCAG                                                                                                                                                                                                                                                                                                                                                                                                                                                                                                                                                                                                                                                                                                                                                                                                                                                                                                                                                                                                                                                                                                                                                                                                                                         |
| dxCas9<br>generator | Composite<br>Module<br>(This study) | BioBrick<br>Prefix                    | GAATTCGCGGCCGCTTCTAGAG                                                                                                                                                                                                                                                                                                                                                                                                                                                                                                                                                                                                                                                                                                                                                                                                                                                                                                                                                                                                                                                                                                                                                                                                                                        |
|                     |                                     | Reverse<br>Terminator<br>L3S3P00      | GGGAGACCAGAAACAAAAAAGGGGAGCGGTTTCCCCTCCCTTCAATAATT<br>GG                                                                                                                                                                                                                                                                                                                                                                                                                                                                                                                                                                                                                                                                                                                                                                                                                                                                                                                                                                                                                                                                                                                                                                                                      |
|                     |                                     | Reverse<br>Standardized<br>dxCas9 CDS | <u>CTCTAGTA</u> TTAGTCACCTCCTAGCTGACTCAAATCAATGCGTGTTTCATAAAG<br>ACCAGTGATGGATTGATGGATAAGAGTGGCATCTAAAACCTCTTTTGTAGACG<br>TATATCGTTTACGATCAATTGTTGTATCAAAATATTTAAAAGCAGCGGGAGCT<br>CCAAGATTTCGTCACGTAATAAATGAATAATATTTTCTGCTTGTTACAGTAT<br>TGGTTTGTCTCTATGTTTGTATATGCACTAAGAACCTTATCTAAATTTGGCAT<br>CTGCTAAAATAACACGCTTAGAAAATTCAGTATTTGCTCAATAATCTCATCT<br>AAATAATGCTTATGCTGCTCCACAACAATGTTTTTTGTTCTGTTATCTTCTGG                                                                                                                                                                                                                                                                                                                                                                                                                                                                                                                                                                                                                                                                                                                                                                                                                                             |

| Name | Type and Parts source | DNA sequence (5'-3')                                                                                                                                                                                                                                                                                                                                                                                                                                                                                                                                                                                                                                                                                                                                                                                                                                                                                                                                                                                                                                                                                                                                                                                                                                                                                                                                                                                                                                                                                                                                                                                                                                                                                                                                                                                                                                                                                                                                                                                                                                                                                                                                                                                                                                                                                                                                                                                                                                                                                                                                                                                                                                                                                                                                                                                                                                                                                                                                                                                                                                                                                                                                                                                                                                                                                                                                                                                                                                                                                                                                                                                                                                                                                                                                                                                                                                                                                                                                                                                                                                                                                                                                                                                                            |
|------|-----------------------|---------------------------------------------------------------------------------------------------------------------------------------------------------------------------------------------------------------------------------------------------------------------------------------------------------------------------------------------------------------------------------------------------------------------------------------------------------------------------------------------------------------------------------------------------------------------------------------------------------------------------------------------------------------------------------------------------------------------------------------------------------------------------------------------------------------------------------------------------------------------------------------------------------------------------------------------------------------------------------------------------------------------------------------------------------------------------------------------------------------------------------------------------------------------------------------------------------------------------------------------------------------------------------------------------------------------------------------------------------------------------------------------------------------------------------------------------------------------------------------------------------------------------------------------------------------------------------------------------------------------------------------------------------------------------------------------------------------------------------------------------------------------------------------------------------------------------------------------------------------------------------------------------------------------------------------------------------------------------------------------------------------------------------------------------------------------------------------------------------------------------------------------------------------------------------------------------------------------------------------------------------------------------------------------------------------------------------------------------------------------------------------------------------------------------------------------------------------------------------------------------------------------------------------------------------------------------------------------------------------------------------------------------------------------------------------------------------------------------------------------------------------------------------------------------------------------------------------------------------------------------------------------------------------------------------------------------------------------------------------------------------------------------------------------------------------------------------------------------------------------------------------------------------------------------------------------------------------------------------------------------------------------------------------------------------------------------------------------------------------------------------------------------------------------------------------------------------------------------------------------------------------------------------------------------------------------------------------------------------------------------------------------------------------------------------------------------------------------------------------------------------------------------------------------------------------------------------------------------------------------------------------------------------------------------------------------------------------------------------------------------------------------------------------------------------------------------------------------------------------------------------------------------------------------------------------------------------------------------------|
|      |                       | <p>ACTACCCCTTCAACTTTTTTCATAATGACTAGCTAAAATATAAAAAATTCACATATT<br/> TGCTTGGCAGAGCCAGCTCATTTCTTTTTGTAA<u>AA</u>CTCCGGCACTAGCCAGC<br/> ATCCGTTTACGACCGTTTTCTAACTCAAAAAGACTATATTTAGGTAGTTTAAAT<br/> GATTAAGTCTTTTTTAACTTCCTTATATCCTTTAGCTTCTAAAAAGTCAATCG<br/> GATTTTTTTCAAAGGAACCTCTTTCCATAATTGTGATCCCTAGTAACTCTTTA<br/> ACGGATTTAACTTCTTCGATTTCCCTTTTTCCACCTTAGCAACCCTAGGAC<br/> TGAATAAGCTACCGTTGGACTATCAAAAACCACCATATTTTTTTGGATCCCGAT<br/> CTTTTTTACGAGCAATAAGCTTGTCCGAATTTCTTTTTGGTAAAAATTGACTCC<br/> TTGGAGAATCCGCTGTCTGTACTTCTGTTTTCTTGACAATATTGACTTGGGG<br/> CATGGACAATACTTTGCGCACTGTGGCAAAATCTCGCCCTTTATCCCAGACAA<br/> TTTCTCCAGTTTCCCATTTAGTTTCGATTAGAGGGCGTTTGGCAATCTCTCCA<br/> TTTGCAAGTGAATTTCTGTTTTGAAGAAGTTCATGATATTAGAGTAAAAGAA<br/> ATATTTTTGCGGTTGCTTTTGCCTATTTCTTGTCTCAGACTTAGCAATCAATCG<br/> GAACATCATAAACTTTATAATCACCATAGACAAACTCCGATTCAAGTTTTTGGGA<br/> TATTTCTTAATCAAAGCAGTTCCAACGACGGCATTAGATACGCATCATGGGC<br/> ATGATGGTAATTGTTAATCTCACGTACTTTATAGAATTGGAATCTTTTTCGGA<br/> AGTCAGAACTAATTTAGATTTTAAGGTAATCACTTTAACCTCTCGAATAAGT<br/> TTATCATTTTCATCGTATTTAGTATTCATGCGACTATCCAAAATTTGTGCCAC<br/> ATGCTTAGTGATTTGGCGAGTTTCAACCAATTGGCGTTTGATAAAAACAGCTT<br/> TATCAAGTTCACTCAAACCTCCACGTTTCAGCTTTTCGTTAAATTTATCAAACCTA<br/> CGTTGAGTGATTAACCTTGGCGTTTGAAGTTGTCTCCAATAGTTTTTCATCTT<br/> TTTACTACTTCTTCACTTGGAACGTTATCCGATTTACCACGATTTTTTATCAG<br/> AACGCGTTAAGACCTTATTGCTATTGAATCGCTTTAAGGAACTTTGTGGGA<br/> ACAATGGCATCGACATCATAATCACTTAAACGATTAATATCTAATTTCTGGTC<br/> CACATACATGTCTCTCCATTTTGGAGATAATAGAGATAGAGCTTTTCATTTT<br/> GCAATTGAGTATTTTCAACAGGATGCTCTTTAAGAATCTGACTTCTCAATCTCT<br/> TTGATACCTTCTCGATTCGTTTTCATACGCTCTCGCAATTTTCTGGCCCTT<br/> TTGAGTTGTCTGATTTTTCACGTGCCATTTCAATAACGATATTTTCTGGCTTAT<br/> GCCGCCCATTACTTTGACCAATTCATCAACAACCTTTTACAGTCTGTAAAATA<br/> CCTTTTTTAAATAGCAGGGCTACCAGCTAAATTTGCAATATGTTTCATGTAACCT<br/> ATCGCCTTGTCCAGACACTTGTGCTTTTTGAATGTCTTCTTTAAATGTCAAAC<br/> TATCATCATGGATCAGCTG<u>A</u>ATAAAATTGCGATTGGCAAAACCATCTGATTTT<br/> AAAAAATCTAATATTGTTTTGCCAGATTGCTTATCCCTAATACCATAATCAA<br/> TTTTTCGAGACAAACGTCCCAACAGTATAACGGCGACGTTTAAAGCTGTTTCA<br/> TCACCTTATCATCAAAGAGGTGAGCATATGTTTTAAGTCTTTCCTCAATCATC<br/> TCCCTATCTTCAAATAAGGTCAATGTTAAAACAATATCCTCTAAGATATCTTC<br/> ATTTTCTTATTATCCAAAAATCTTTATCTTTAATAATTTTTTAGCAATCAT<br/> GGTAGGTACCTAATGAAGCATTAAATCTATCTTCAACTCCTGAAATTTCAACA<br/> CTATCAAACATTTCTATTTTTTTGAAATAATCTTCTTTTAAATGCTTTAACGGT<br/> TACTTTTTCGATTTGTTTTGAAGAGTAAATCAACAATAGGCTTCTTCTGATC<u>A</u>TCAC<br/> CTGAAAGAAATGCTGGTTTTTCGCATTCCTTCAGTAACATATTTGACCTTTGTC<br/> AATTCGTTATAAACCGTAAAAACTCATAAAGCAAACCTATGTTTTGGTAGTAC<br/> TTTTTTCATTTGGAAGATTTTTATCAAAGTTTGTTCATGCGTTCAATAAATGATT<br/> GAGCTGAAGCACCTTTATCGACAACCTTTTCAAATTTCCATGGGGTAATTTGTT<br/> TCTTCAGACTTCCGAGTATCCATGCAAAACGACTATTGCCACGCGCCAATGG<br/> ACCAACATAATAAGGAATACGAAAAGTCAAGATTTTTTCAATTTCTTACAGT<br/> TGTCTTTTTAAAAATGGATAAAAAGTCTTCTTGTCTTCTCAAAATAGCATGCAGC<br/> TCACCCAAGTGAATTTGATGGGAATA<u>AT</u>GCCGTTGTCAAAGTCCGTTGCTT<br/> GCGCAGCAAATCTTACGATTTAGTTTTACCAATAATTCCTCAGTACCATCCA<br/> TTTTTTCTAAAATTTGGTTTTGATAAATTTATAAAATTTCTTCTGGCTAGCTCCC<br/> CCATCAATATAACCTGCATATCCGTTTTTTGATTGATCAAAAAAGATTTCTTT<br/> ATACTTTTCTGGAAGTTGTTGTGCAACTAAAGCTTTTAAAGAGTCAAGTCTT<br/> GATGATGTTTCATCGTA<u>TAA</u>TTTAATCATTGAAGCTGATAGGGGAGCCTTAGTT<br/> ATTTACGATTTTACTCTTAGGATATCTGAAAGTAAAATAGCATCTGATAAAT<br/> CTTAGCTGCCAAAACAATCAGCATATTGATCTCCAATTTGCGCCAATAAAT<br/> TATCTAAATCATCATCGTAAGTATCTTTTTGAAAGCTGTAATTT<u>GGT</u>ATCTTCT<br/> GCCAAATCAAATTTGATTTAAAATTTAGGGGTCAAACCCAATGACAAAAGCAAT<br/> GAGATTTCCAAAATAAGCCATTTTCTTCTCACCGGGAGCTGAGCAATGAGAT<br/> TTTCTAATCGTCTTGATTTACTCAATCGTGCAGAAAGAATCGCTTTAGCATCT<br/> ACTCCACTTGCCTTAATAGGGTTTTCTTCAATAATTGATTGTAGGTTTTGTAC<br/> CAACTGGATAAAATAGTTTGTCCACATCACTATATCAGGATTTAAATCTCCCT<br/> CAATCAAAAAATGACCACGAACTTAATCATATGCGCTAAGGCCAAATAGATT<br/> AAGCGCAAATCCGCTTTATCAGTAGAATCTACCAATTTTTTTTCGCAGATGATA<br/> GATAGTTGGATATTTCTCATGATAAGCAACTTCATCTACTATATTTCCAAAAA<br/> TAGGATGACGTTTCATGCTTCTGTCTTCTCCACCAAAAAAGACTCTTCAAGT<br/> CGATGAAAGAAACTATCATCTACTTTTCGCCATCTCAATTTGAAAAAATCTCCGT<br/> TAGATAACAAATACGATTTCTCCGACGTGTATACCTTCTACGAGCTGTCCGTT<br/> TGAGGGCAGTCGCTTCCGCTGTCTCTCCACTGTCAAATAAAAGAGCCCTATA</p> |

| Name | Type and source | Parts                         | DNA sequence (5'-3')                                                                                                                                                                                                                                                                                                                                                                                                                                                                                                                                                                                                                                                                                                        |
|------|-----------------|-------------------------------|-----------------------------------------------------------------------------------------------------------------------------------------------------------------------------------------------------------------------------------------------------------------------------------------------------------------------------------------------------------------------------------------------------------------------------------------------------------------------------------------------------------------------------------------------------------------------------------------------------------------------------------------------------------------------------------------------------------------------------|
|      |                 |                               | AGATTTTTTTTGATACTGTGGCGGTCTGTATTTCCCAGAACCTTGAACTTTTT<br>AGACGGAACCTTATATTCATCAGTGATCACCGCCCATCCGACGCTATTTGTGC<br>CGATAGCTAAGCCTATTGAGTATTTCTTATCCAT<br>( <a href="#">Scar/Spacer</a> , <b>mutation</b> )                                                                                                                                                                                                                                                                                                                                                                                                                                                                                                                   |
|      |                 | Reverse RBS<br>B0034          | <a href="#">AGATCC</a> TTTTCTCCTCTTT<br><br>( <a href="#">Scar/Spacer</a> )                                                                                                                                                                                                                                                                                                                                                                                                                                                                                                                                                                                                                                                 |
|      |                 | <i>tetR/tetA</i><br>promoters | AGATCTTTTT <b>CA</b> ATTCTTTTCTCTATCACTGATAGGGAGTGGTAAAATAACTCT<br>ATCAACGATAGAGTGTCAACAAAAATTAGGAATTAATG<br>( <b>mutation</b> )                                                                                                                                                                                                                                                                                                                                                                                                                                                                                                                                                                                            |
|      |                 | <i>tetR</i> CDS               | ATGTC <b>A</b> AGATTAGATAAAAAGTAAAGTGATTAACAGCGCATTAGAGCTGCTTAA<br>TGAGGTCGGAATCGAAGGTTTAAACAACCCGTAAACTCGCCAGAAAGCTAGGTG<br>TAGAGCAGCCTACATTGTATTGGCATGTAAAAATAAGCGGGCTTTGCTCGAC<br>GCCTTAGCCATTGAGATGTTAGATAGGCACCATACTCACTTTTGCCCTTTAGA<br>AGGGGAAAGCTGGCAAGATTTTTTACGTAATAACGCTAAAAGTTTTAGATGTG<br>CTTTACTAAGTCATCGCGATGGAGCAAAAGTACATTTAGGTACACGGCCTACA<br>GAAAACAGTATGAAACTCTGAAAATCAATTAGCCTTTTTATGCCAACAAGG<br>TTTTTCACTAGAGAATGCATTATATGCACTCAGCGCTGTGGGGCATTTTACTT<br>TAGGTTGCGTATTGGAAGATCAAGAGCATCAAGTCGCTAAAGAAGAAAGGGAA<br>ACACCTACTACTGATAGTATGCCGCCATTATTACGACAAGCTATCGAATTATT<br>TGATACCAAGGTGCAGAGCCAGCCTTCTTATTCGGCCTTGAATTGATCATAT<br>GCGGATTAGAAAAACAACCTTAAATGTGAAAGTGGGTCTTAA<br>( <b>mutation</b> ) |
|      |                 | Terminator<br>L3S3P22         | <a href="#">TACTAGAG</a> CCAATTATTGAAGCCGCTAACGGCCCTTTTTTTGTTTCTGGTC<br>TCCC<br>( <a href="#">Scar/Spacer</a> )                                                                                                                                                                                                                                                                                                                                                                                                                                                                                                                                                                                                             |
|      |                 | BioBrick<br>Suffix            | TACTAGTAGCGCCGCTGCAG                                                                                                                                                                                                                                                                                                                                                                                                                                                                                                                                                                                                                                                                                                        |

**Supplementary Table 7: Sequences for activator generator and reporter**

| Name                                  | Type and source                        | Parts                                 | DNA sequence (5'-3')                                                                                                                                                                                                                                                                                                                                                                                                                                                                                                                                                                                                                                                                                                                                                                                                                                                                                                                                                                                                                                                                                             |
|---------------------------------------|----------------------------------------|---------------------------------------|------------------------------------------------------------------------------------------------------------------------------------------------------------------------------------------------------------------------------------------------------------------------------------------------------------------------------------------------------------------------------------------------------------------------------------------------------------------------------------------------------------------------------------------------------------------------------------------------------------------------------------------------------------------------------------------------------------------------------------------------------------------------------------------------------------------------------------------------------------------------------------------------------------------------------------------------------------------------------------------------------------------------------------------------------------------------------------------------------------------|
| PspFΔHTH::<br>λN22plus                | Composite<br>Module<br>(This<br>study) | RBS B0032                             | TCACACAGGAAAG <u>TA</u> <u>CTAG</u><br><br>( <a href="#">Scar/Spacer</a> )                                                                                                                                                                                                                                                                                                                                                                                                                                                                                                                                                                                                                                                                                                                                                                                                                                                                                                                                                                                                                                       |
|                                       |                                        | <i>pspFΔHTH::λ<br/>N22plus</i><br>CDS | ATGGCAGAATACAAAGATAATTTACTTGGTGAGGCGAACAGCTTTCTCGAA<br>GTGCTGGAACAGGTTTCGCATCTCGCACCGCTGGACAAACCGGTGCTCATC<br>ATCGGCGAACGCGGCACCGGTAAGAGCTGATTGCCAGCCGCTGCATTAT<br>CTCTCCTCCCCTGGCAAGGGCCGTTTATTTCCCTAACTGCGCGGCGTTA<br>AATGAAAATCTGCTGGATTCCGAACTGTTTGGTCACGAAGCGGGGGCGTTT<br>ACCGGTGCGCAAAAACGTCATCCAGGGAGATTTGAACGTGCCGACGGCGGT<br>ACGTATTTCTTGGATGAACCTCGCTACGGCACCGATGATGGTGCAGGAGAAA<br>TTATTGCGCGTGATTGAGTACGGTGAACCTGGAGCGGTTGGCGCGACCCAA<br>CCATTGCAGGTGAATGTGCGGTTGGTATGCGCGACGAATGCCGATCTCCC<br>GCGATGGTCAATGAAGGCACTTTTCGCGCTGACCTGCTCGACCGACTGGCT<br>TTTGATGTTGTACAACCTGCCACCACTGCGCGAGCGGAAAGCGACATAATG<br>TTGATGGCAGAATACTTTGCCATCCAGATGTGTCGGGAAATCAAGCTGCCT<br>CTGTTCCCAGGGTTTACGGAGCGCGCCAGAGAAAATTGCTGAATTATCGT<br>TGGCCGGGAAATATTCTGTAATTGAAAAACGTGGTGAACGTTTCAAGTGTAT<br>CGCCACGGCACCGGATTATCCGCTTGGTATGACATCATTATGATCCCTTT<br>AAACGGCGTCCGCTGAAGACGCTATCGCCGTTTTCAGAAACCACCTCGCTT<br>CCAACACTGCCGCTGGATTTACGTGAGTTTTCAGATGCAGCAGGAAAAAGAG<br>TTGCTGCAACTCAGTTTGCAA <u>ATGAATGCACGCACACGCCCGCCGCGAACGT</u><br><u>CGCGCAGAGAAACAGGCTCAATGGAAAGCAGCAAATTA</u><br>( <a href="#">λN22plus</a> ) |
|                                       |                                        | Terminator<br>L3S3P22                 | <u>TA</u> <u>CTAGAG</u> <u>CCAATTATTGAAGCCGCTAACGCGCCTTTTTTTGTTTCTGG</u><br>TCTCCC<br>( <a href="#">Scar/Spacer</a> )                                                                                                                                                                                                                                                                                                                                                                                                                                                                                                                                                                                                                                                                                                                                                                                                                                                                                                                                                                                            |
| Reporter<br>with<br>sfGFP::ASV<br>tag | Composite<br>Module<br>(This<br>study) | RiboJ                                 | AGCTGTCACCGGATGTGCTTTCCGGTCTGATGAGTCCGTGAGGACGAAACA<br>GCCTCTACAAATAATTTTGTTTAACTAGAG                                                                                                                                                                                                                                                                                                                                                                                                                                                                                                                                                                                                                                                                                                                                                                                                                                                                                                                                                                                                                            |
|                                       |                                        | RBS B0030                             | ATTAAAGAGGAGAAA <u>TACCAT</u><br>( <a href="#">Scar/Spacer</a> )                                                                                                                                                                                                                                                                                                                                                                                                                                                                                                                                                                                                                                                                                                                                                                                                                                                                                                                                                                                                                                                 |
|                                       |                                        | <i>sfgfp</i><br>CDS                   | ATGCGTAAAGGCGAAGAGCTGTTCACTGGTGTGCTCCCTATTCTGGTGGAA<br>CTGGATGGTGAATGTCACCGGTCATAAGTTTTCCGTGCGTGGCGAGGGTGAA<br>GGTGACGCAACTAATGGTAAACTGACGCTGAAGTTCATCTGTACTACTGGT<br>AAACTGCCGGTACCTTGGCCGACTCTGGTAACGACGCTGACTTATGGTGT<br>CAGTGCTTTGCTGTTATCCGGACCATATGAAGCAGCATGACTTCTTCAAG<br>TCCGCCATGCCGGAAGGCTATGTGCAGGAACGCACGATTTCTTTAAGGAT<br>GACGGCACGTACAAAACGCGTGCAGGAAAGTGAATTTGAAGGCGATACCCTG<br>GTAAACCGCATTGAGCTGAAAGGCATTGACTTTAAAGAAGACGGCAATATC<br>CTGGCCATAAGCTGGAATACAAATTTTAAACAGCCACAATGTTTACATCACC<br>GCCGATAAACAAAAAATGGCATTAAAGCGAATTTTAAAATTCGCCACAAC<br>GTGGAGGATGGCAGCGTGCAGCTGGCTGATCACTACCAGCAAAACTCCA<br>ATCGGTGATGGTCTGTTCTGCTGCCAGACAATCACTATCTGAGCAGCAA<br>AGCGTTCTGTCTAAAGATCCGAACGAGAAACGCGATCATATGGTCTGCTG<br>GAGTTCGTAACCGCAGCGGGCATCACGCATGGTATGGATGAACGTACAAA<br><u>AGGCCTGCTGCAAAACGACGAAAACACTACGCTGCATCAGTTTAA</u><br>( <a href="#">ASV tag</a> )                                                                                                                                                                                                                                   |
|                                       |                                        | Terminator<br>L3S3P21                 | <u>TA</u> <u>ACTAGAG</u> <u>CCAATTATTGAAGCCTCCCTAACGGGGGCCCTTTTTTTG</u><br>TTTCTGGTCTCCC<br>( <a href="#">Scar/Spacer</a> )                                                                                                                                                                                                                                                                                                                                                                                                                                                                                                                                                                                                                                                                                                                                                                                                                                                                                                                                                                                      |
| RiboJ                                 | Insulator                              |                                       | AGCTGTCACCGGATGTGCTTTCCGGTCTGATGAGTCCGTGAGGACGAAACAGCCTCTACAAATA<br>ATTTTGTTTAA                                                                                                                                                                                                                                                                                                                                                                                                                                                                                                                                                                                                                                                                                                                                                                                                                                                                                                                                                                                                                                  |

**Supplementary Table 8: Sequences of gRNA, mRNA and related genetic elements**

| Part name      | Type and source           | DNA sequence (5'– 3')                                                                                                                                                                                                                                                                                                                                                                                                                                                                                                                                                                                          |
|----------------|---------------------------|----------------------------------------------------------------------------------------------------------------------------------------------------------------------------------------------------------------------------------------------------------------------------------------------------------------------------------------------------------------------------------------------------------------------------------------------------------------------------------------------------------------------------------------------------------------------------------------------------------------|
| sgRNA-LEA2     | sgRNA<br>(Previous study) | <a href="#">CTAGAAGTTATTATATAGTTCGGTCGTTT</a> <a href="#">GAGAGCTAGGGCCCTGAAGAAGGGCCCTAGCA</a><br><a href="#">AGTTC</a> <a href="#">CAATAAAGGCTAGTCCGTTATCAACTTGGGCCCTGAAGAAGGGCCCAAGTGGCACCG</a><br><a href="#">AGTCCGGTGCTTTTTTT</a> <a href="#">GAAGCTTCTCGGTACCAAATCCAGAAAAGAGGCCCTCCCGAAAGG</a><br><a href="#">GGGGCCTTTTTTCGTTTTGGTCC</a><br>( <a href="#">Scar</a> , <a href="#">Spacer</a> , sgRNA scaffold (Double BoxB), <a href="#">Terminator L3S2P21</a> )                                                                                                                                        |
| sgRNA-LEA2-ex2 | sgRNA<br>(This study)     | <a href="#">CTAGAAGTTATTATATAGTTCGGTCGTTT</a> <a href="#">GAGAGCTAGAAATAGCAAGTTC</a> <a href="#">AAATAAAGGCT</a><br><a href="#">AGTCCGTTATCAACTT</a> <a href="#">GAAAAAGTGGCACCGAGTCGGTGC</a> <a href="#">CgggccctgaagaagGGCCCTA</a><br><a href="#">GCAAGTTC</a> <a href="#">AAATAAAGGCTAGTCCGTTATCAACTTGGGCCCTGAAGAAGGGCCCAAGTGGCA</a><br><a href="#">CCGAGTCGGTGCTTTTTTT</a> <a href="#">ACTAGAGCTCGGTACCAAATCCAGAAAAGAGGCCCTCCCGA</a><br><a href="#">AAGGGGGCCTTTTTTCGTTTTGGTCC</a><br>( <a href="#">Scar</a> , <a href="#">Spacer</a> , sgRNA scaffold (Double BoxB), <a href="#">Terminator L3S2P21</a> ) |
| sgRNA-LEA2-ex3 | sgRNA<br>(This study)     | <a href="#">CTAGAAGTTATTATATAGTTCGGTCGTTT</a> <a href="#">GAGAGCTAGAAATAGCAAGTTC</a> <a href="#">AAATAAAGGCT</a><br><a href="#">AGTCCGTTATCAACTT</a> <a href="#">GAAAAAGTGGCACCGAGTCGGTGC</a> <a href="#">CgggccctgaagaagGGCCCA</a><br><a href="#">GGCTAGGGCCCTGAAGAAGGGCCCGCAGGGCCCTGAAGAAGGGCCCTTTTTTT</a> <a href="#">ACTAGAG</a><br><a href="#">CTCGGTACCAAATCCAGAAAAGAGGCCCTCCCGAAAGGGGGCCTTTTTTCGTTTTGGTCC</a><br>( <a href="#">Scar</a> , <a href="#">Spacer</a> , sgRNA scaffold (Double BoxB), <a href="#">Terminator L3S2P21</a> )                                                                   |
| sgRNA-LEB3-ex2 | sgRNA<br>(This study)     | <a href="#">CTAGAGCATAGTTCGTTTCCCATGTTT</a> <a href="#">GAGAGCTAGAAATAGCAAGTTC</a> <a href="#">AAATAAAGGCTAG</a><br><a href="#">TCCGTTATCAACTT</a> <a href="#">GAAAAAGTGGCACCGAGTCGGTGC</a> <a href="#">CgggccctgaagaagGGCCCTAGC</a><br><a href="#">AAGTTC</a> <a href="#">AAATAAAGGCTAGTCCGTTATCAACTTGGGCCCTGAAGAAGGGCCCAAGTGGCACCC</a><br><a href="#">GAGTCGGTGCTTTTTTT</a> <a href="#">ACTAGAGCTCGGTACCAAATCCAGAAAAGAGGCCCTCCCGAAA</a><br><a href="#">GGGGGCCTTTTTTCGTTTTGGTCC</a><br>( <a href="#">Scar</a> , <a href="#">Spacer</a> , sgRNA scaffold (Double BoxB), <a href="#">Terminator L3S2P21</a> )  |
| sgRNA-LEB3-ex3 | sgRNA<br>(This study)     | <a href="#">CTAGAGCATAGTTCGTTTCCCATGTTT</a> <a href="#">GAGAGCTAGAAATAGCAAGTTC</a> <a href="#">AAATAAAGGCTAG</a><br><a href="#">TCCGTTATCAACTT</a> <a href="#">GAAAAAGTGGCACCGAGTCGGTGC</a> <a href="#">CgggccctgaagaagGGCCCAAGG</a><br><a href="#">CTAGGGCCCTGAAGAAGGGCCCGCAGGGCCCTGAAGAAGGGCCCTTTTTTT</a> <a href="#">TACTAGAGCT</a><br><a href="#">CGGTACCAAATCCAGAAAAGAGGCCCTCCCGAAAGGGGGCCTTTTTTCGTTTTGGTCC</a><br>( <a href="#">Scar</a> , <a href="#">Spacer</a> , sgRNA scaffold (Double BoxB), <a href="#">Terminator L3S2P21</a> )                                                                   |
| crRNA-LEA2-WT  | crRNA<br>(This study)     | <a href="#">CTAGAAGTTATTATATAGTTCGGTCGTTT</a> <a href="#">TAGAGCTATGCTGTTTTG</a> <a href="#">TACTAGAGCCAATT</a><br><a href="#">ATTGAAGCCGCTAACCGGCCTTTTTTTGTTTCTGGTCTCCC</a><br>( <a href="#">Scar</a> , <a href="#">Spacer</a> , <a href="#">repeat</a> , <a href="#">Terminator L3S3P22</a> )                                                                                                                                                                                                                                                                                                                |
| crRNA-LEA2-d1  | crRNA<br>(This study)     | <a href="#">CTAGAAGTTATTATATAGTTCGGTCGTTT</a> <a href="#">TAGAGCTTTGCTGTTTTG</a> <a href="#">TACTAGAGCCAATT</a><br><a href="#">ATTGAAGCCGCTAACCGGCCTTTTTTTGTTTCTGGTCTCCC</a><br>( <a href="#">Scar</a> , <a href="#">Spacer</a> , <a href="#">repeat</a> , <a href="#">Terminator L3S3P22</a> )                                                                                                                                                                                                                                                                                                                |
| crRNA-LEA2-d2  | crRNA<br>(This study)     | <a href="#">CTAGAAGTTATTATATAGTTCGGTCGTTT</a> <a href="#">TAGAGCATTGCTGTTTTG</a> <a href="#">TACTAGAGCCAATT</a><br><a href="#">ATTGAAGCCGCTAACCGGCCTTTTTTTGTTTCTGGTCTCCC</a><br>( <a href="#">Scar</a> , <a href="#">Spacer</a> , <a href="#">repeat</a> , <a href="#">Terminator L3S3P22</a> )                                                                                                                                                                                                                                                                                                                |
| crRNA-LEA2-d3  | crRNA<br>(This study)     | <a href="#">CTAGAAGTTATTATATAGTTCGGTCGTTT</a> <a href="#">TAGAGGATTGCTGTTTTG</a> <a href="#">TACTAGAGCCAATT</a><br><a href="#">ATTGAAGCCGCTAACCGGCCTTTTTTTGTTTCTGGTCTCCC</a><br>( <a href="#">Scar</a> , <a href="#">Spacer</a> , <a href="#">repeat</a> , <a href="#">Terminator L3S3P22</a> )                                                                                                                                                                                                                                                                                                                |
| crRNA-LEA2-d4  | crRNA<br>(This study)     | <a href="#">CTAGAAGTTATTATATAGTTCGGTCGTTT</a> <a href="#">TAGACGATTGCTGTTTTG</a> <a href="#">TACTAGAGCCAATT</a><br><a href="#">ATTGAAGCCGCTAACCGGCCTTTTTTTGTTTCTGGTCTCCC</a><br>( <a href="#">Scar</a> , <a href="#">Spacer</a> , <a href="#">repeat</a> , <a href="#">Terminator L3S3P22</a> )                                                                                                                                                                                                                                                                                                                |
| crRNA-LEA2-U1  | crRNA<br>(This study)     | <a href="#">CTAGAAGTTATTATATAGTTCGGTCGTTT</a> <a href="#">TGACGATTGCTGTTTTG</a> <a href="#">TACTAGAGCCAATT</a><br><a href="#">ATTGAAGCCGCTAACCGGCCTTTTTTTGTTTCTGGTCTCCC</a><br>( <a href="#">Scar</a> , <a href="#">Spacer</a> , <a href="#">repeat</a> , <a href="#">Terminator L3S3P22</a> )                                                                                                                                                                                                                                                                                                                 |
| crRNA-LEA2-U2  | crRNA<br>(This study)     | <a href="#">CTAGAAGTTATTATATAGTTCGGTCGTTT</a> <a href="#">ATGACGATTGCTGTTTTG</a> <a href="#">TACTAGAGCCAATT</a><br><a href="#">ATTGAAGCCGCTAACCGGCCTTTTTTTGTTTCTGGTCTCCC</a><br>( <a href="#">Scar</a> , <a href="#">Spacer</a> , <a href="#">repeat</a> , <a href="#">Terminator L3S3P22</a> )                                                                                                                                                                                                                                                                                                                |
| crRNA-LEA2-U3  | crRNA<br>(This study)     | <a href="#">CTAGAAGTTATTATATAGTTCGGTCGTTA</a> <a href="#">ATGACGATTGCTGTTTTG</a> <a href="#">TACTAGAGCCAATT</a><br><a href="#">ATTGAAGCCGCTAACCGGCCTTTTTTTGTTTCTGGTCTCCC</a><br>( <a href="#">Scar</a> , <a href="#">Spacer</a> , <a href="#">repeat</a> , <a href="#">Terminator L3S3P22</a> )                                                                                                                                                                                                                                                                                                                |

| Part name      | Type and source          | DNA sequence (5'– 3')                                                                                                                                                                                                                                                                               |
|----------------|--------------------------|-----------------------------------------------------------------------------------------------------------------------------------------------------------------------------------------------------------------------------------------------------------------------------------------------------|
| crRNA-LEA2-U4  | crRNA<br>(This study)    | <u>CTAGAAGTTATTATATAGTTCGGTCGTA</u> AAATGACGATTGCTGTTTTG <u>TACTAGAGCCAATT</u><br>ATTGAAGCCGCTAACCGGCCTTTTTTGTCTGGTCTCCC<br>(Scar, Spacer, repeat, Terminator L3S3P22)                                                                                                                              |
| crRNA-LEA2-U5  | crRNA<br>(This study)    | <u>CTAGAAGTTATTATATAGTTCGGTCG</u> AAAAATGACGATTGCTGTTTTG <u>TACTAGAGCCAATT</u><br>ATTGAAGCCGCTAACCGGCCTTTTTTGTCTGGTCTCCC<br>(Scar, Spacer, repeat, Terminator L3S3P22)                                                                                                                              |
| crRNA-LEA2-U5A | crRNA<br>(This study)    | <u>CTAGAAGTTATTATATAGTTCGGTC</u> AAAAATGACGATTGCTGTTTTG <u>TACTAGAGCCAATT</u><br>ATTGAAGCCGCTAACCGGCCTTTTTTGTCTGGTCTCCC<br>(Scar, Spacer, repeat, Terminator L3S3P22)                                                                                                                               |
| crRNA-LEA2-U5C | crRNA<br>(This study)    | <u>CTAGAAGTTATTATATAGTTCGGTC</u> AAAAATGACGATTGCTGTTTTG <u>TACTAGAGCCAATT</u><br>ATTGAAGCCGCTAACCGGCCTTTTTTGTCTGGTCTCCC<br>(Scar, Spacer, repeat, Terminator L3S3P22)                                                                                                                               |
| crRNA-LEA2-U5T | crRNA<br>(This study)    | <u>CTAGAAGTTATTATATAGTTCGGTC</u> TAAATGACGATTGCTGTTTTG <u>TACTAGAGCCAATT</u><br>ATTGAAGCCGCTAACCGGCCTTTTTTGTCTGGTCTCCC<br>(Scar, Spacer, repeat, Terminator L3S3P22)                                                                                                                                |
| crRNA-LEB3-WT  | crRNA<br>(This study)    | <u>CTAGAGCATAGTTCGTTCCCATG</u> TTTTAGAGCTATGCTGTTTTG <u>TACTAGAGCCAATT</u> AT<br>TGAAGCCGCTAACCGGCCTTTTTTGTCTGGTCTCCC<br>(Scar, Spacer, repeat, Terminator L3S3P22)                                                                                                                                 |
| tracrRNA-WT    | tracrRNA<br>(This study) | <u>CTAGAGGAACCATTCAA</u> AACAGCATAGCAAGTTAAATAAAGGCTAGTCCGTTATCAACTTG<br>AAAAAGTGGCACCAGTTCGGTGCggggccctGAAGAAGGCCCAAGGCTAGGGCCCTGAAGA<br>AGGGCCCGCAGGGCCCTGAAGAAGGGCCCTTTTTTTACTAGAGCCAATTATTGAAGGCCG<br>CTAACCGGCCTTTTTTGTCTGGTCTCCC<br>(Scar, Scaffold, anti-repeat, bulge, Terminator L3S3P22)  |
| tracrRNA-d1    | tracrRNA<br>(This study) | <u>CTAGAGGAACCATTCAA</u> AACAGCAAAGCAAGTTAAATAAAGGCTAGTCCGTTATCAACTTG<br>AAAAAGTGGCACCAGTTCGGTGCggggccctgaagaagGCCCAAGGCTAGGGCCCTGAAGA<br>AGGGCCCGCAGGGCCCTGAAGAAGGGCCCTTTTTTTACTAGAGCCAATTATTGAAGGCCG<br>CTAACCGGCCTTTTTTGTCTGGTCTCCC<br>(Scar, Scaffold, anti-repeat, bulge, Terminator L3S3P22)  |
| tracrRNA-d2    | tracrRNA<br>(This study) | <u>CTAGAGGAACCATTCAA</u> AACAGCAATCGAAGTTAAATAAAGGCTAGTCCGTTATCAACTTG<br>AAAAAGTGGCACCAGTTCGGTGCggggccctgaagaagGCCCAAGGCTAGGGCCCTGAAGA<br>AGGGCCCGCAGGGCCCTGAAGAAGGGCCCTTTTTTTACTAGAGCCAATTATTGAAGGCCG<br>CTAACCGGCCTTTTTTGTCTGGTCTCCC<br>(Scar, Scaffold, anti-repeat, bulge, Terminator L3S3P22)  |
| tracrRNA-d3    | tracrRNA<br>(This study) | <u>CTAGAGGAACCATTCAA</u> AACAGCAATCCAAGTTAAATAAAGGCTAGTCCGTTATCAACTTG<br>AAAAAGTGGCACCAGTTCGGTGCggggccctGAAGAAGGCCCAAGGCTAGGGCCCTGAAGA<br>AGGGCCCGCAGGGCCCTGAAGAAGGGCCCTTTTTTTACTAGAGCCAATTATTGAAGGCCG<br>CTAACCGGCCTTTTTTGTCTGGTCTCCC<br>(Scar, Scaffold, anti-repeat, bulge, Terminator L3S3P22)  |
| tracrRNA-d4    | tracrRNA<br>(This study) | <u>CTAGAGGAACCATTCAA</u> AACAGCAATCGAAGTTAAATAAAGGCTAGTCCGTTATCAACTTG<br>AAAAAGTGGCACCAGTTCGGTGCggggccctGAAGAAGGCCCAAGGCTAGGGCCCTGAAGA<br>AGGGCCCGCAGGGCCCTGAAGAAGGGCCCTTTTTTTACTAGAGCCAATTATTGAAGGCCG<br>CTAACCGGCCTTTTTTGTCTGGTCTCCC<br>(Scar, Scaffold, anti-repeat, bulge, Terminator L3S3P22)  |
| tracrRNA-U1    | tracrRNA<br>(This study) | <u>CTAGAGGAACCATTCAA</u> AACAGCAATCGAAGTAAAAATAAAGGCTAGTCCGTTATCAACTTG<br>AAAAAGTGGCACCAGTTCGGTGCggggccctGAAGAAGGCCCAAGGCTAGGGCCCTGAAGA<br>AGGGCCCGCAGGGCCCTGAAGAAGGGCCCTTTTTTTACTAGAGCCAATTATTGAAGGCCG<br>CTAACCGGCCTTTTTTGTCTGGTCTCCC<br>(Scar, Scaffold, anti-repeat, bulge, Terminator L3S3P22) |
| tracrRNA-U2    | tracrRNA<br>(This study) | <u>CTAGAGGAACCATTCAA</u> AACAGCAATCGAAGTATAAATAAAGGCTAGTCCGTTATCAACTTG<br>AAAAAGTGGCACCAGTTCGGTGCggggccctGAAGAAGGCCCAAGGCTAGGGCCCTGAAGA<br>AGGGCCCGCAGGGCCCTGAAGAAGGGCCCTTTTTTTACTAGAGCCAATTATTGAAGGCCG<br>CTAACCGGCCTTTTTTGTCTGGTCTCCC<br>(Scar, Scaffold, anti-repeat, bulge, Terminator L3S3P22) |
| tracrRNA-U3    | tracrRNA<br>(This study) | <u>CTAGAGGAACCATTCAA</u> AACAGCAATCGAAGTATTAATAAAGGCTAGTCCGTTATCAACTTG<br>AAAAAGTGGCACCAGTTCGGTGCggggccctGAAGAAGGCCCAAGGCTAGGGCCCTGAAGA                                                                                                                                                             |



| Part name     | Type and source          | DNA sequence (5'– 3')                                                                                                                                                                                                                                                                            |
|---------------|--------------------------|--------------------------------------------------------------------------------------------------------------------------------------------------------------------------------------------------------------------------------------------------------------------------------------------------|
|               |                          | AGGGCCCGCAGGGCCCTGAAGAAGGGCCCTTTTTTTTACTAGAGCCAATTATTGAAGGCCGCTAACCGCGCCTTTTTTTGTTTCTGGTCTCCC<br>(Scar, Scaffold, anti-repeat, bulge, Terminator L3S3P22)                                                                                                                                        |
| tracrRNA-U4   | tracrRNA<br>(This study) | CTAGAGGAACCATTCAAACAGCAATCGAAGTATTTATAAGGCTAGTCCGTTATCAACTTGAAAAAGTGGCACCAGTTCGGTGCAGGGCCCTGAAGAAGGGCCCAAGGCTAGGGCCCTGAAGAAGGGCCCGCAGGGCCCTGAAGAAGGGCCCTTTTTTTTACTAGAGCCAATTATTGAAGGCCGCTAACCGCGCCTTTTTTTGTTTCTGGTCTCCC<br>(Scar, Scaffold, anti-repeat, bulge, Terminator L3S3P22)              |
| tracrRNA-U5   | tracrRNA<br>(This study) | CTAGAGGAACCATTCAAACAGCAATCGAAGTATTTATAAGGCTAGTCCGTTATCAACTTGAAAAAGTGGCACCAGTTCGGTGCAGGGCCCTGAAGAAGGGCCCAAGGCTAGGGCCCTGAAGAAGGGCCCGCAGGGCCCTGAAGAAGGGCCCTTTTTTTTACTAGAGCCAATTATTGAAGGCCGCTAACCGCGCCTTTTTTTGTTTCTGGTCTCCC<br>(Scar, Scaffold, anti-repeat, bulge, Terminator L3S3P22)              |
| tracrRNA-ESI  | tracrRNA<br>(This study) | ACTAGT <b>GAGACC</b> CGGAACCATTCAAAGCTTTAAGGCTAGTCCGGTCTCACGTTATCAACTTGAAAAAGTGGCACCAGTTCGGTGCAGGGCCCTGAAGAAGGGCCCAAGGCTAGGGCCCTGAAGAAGGGCCCGCAGGGCCCTGAAGAAGGGCCCTTTTTTTTACTAGAGCTCGGTACCAAATTCAGAAAAGAGGCCTCCCGAAAGGGGGCCCTTTTTTCGTTTTGGTCC<br>(Scar, Scaffold, BsaI site, Terminator L3S2P21) |
| tracrRNA-R1   | tracrRNA<br>(This study) | CTAGAGGAACCATTCTTGTAGATGAACAAGTGCCGTTAAGGCTAGTCCGTTATCAACTTGAAAAAGTGGCACCAGTTCGGTGCAGGGCCCTGAAGAAGGGCCCAAGGCTAGGGCCCTGAAGAAGGGCCCGCAGGGCCCTGAAGAAGGGCCCTTTTTTTTACTAGAGCTCGGTACCAAATTCAGAAAAGAGGCCTCCCGAAAGGGGGCCCTTTTTTCGTTTTGGTCC<br>(Scar, Scaffold, anti-repeat, bulge, Terminator L3S2P21)   |
| tracrRNA-R2   | tracrRNA<br>(This study) | CTAGAGGAACCATTGCTCGGAGGAGGCCAAGTCCAGCTAAGGCTAGTCCGTTATCAACTTGAAAAAGTGGCACCAGTTCGGTGCAGGGCCCTGAAGAAGGGCCCAAGGCTAGGGCCCTGAAGAAGGGCCCGCAGGGCCCTGAAGAAGGGCCCTTTTTTTTACTAGAGCTCGGTACCAAATTCAGAAAAGAGGCCTCCCGAAAGGGGGCCCTTTTTTCGTTTTGGTCC<br>(Scar, Scaffold, anti-repeat, bulge, Terminator L3S2P21)  |
| tracrRNA-R3   | tracrRNA<br>(This study) | CTAGAGGAACCATTAGGTGGTCTTGACCAAGTAGCGTTAAGGCTAGTCCGTTATCAACTTGAAAAAGTGGCACCAGTTCGGTGCAGGGCCCTGAAGAAGGGCCCAAGGCTAGGGCCCTGAAGAAGGGCCCGCAGGGCCCTGAAGAAGGGCCCTTTTTTTTACTAGAGCTCGGTACCAAATTCAGAAAAGAGGCCTCCCGAAAGGGGGCCCTTTTTTCGTTTTGGTCC<br>(Scar, Scaffold, anti-repeat, bulge, Terminator L3S2P21)  |
| tracrRNA-R2L1 | tracrRNA<br>(This study) | CTAGAGGAACCATTCTCGGAGGAGGCCAAGTCCAGCTAAGGCTAGTCCGTTATCAACTTGA AAAAGTGGCACCAGTTCGGTGCAGGGCCCTGAAGAAGGGCCCAAGGCTAGGGCCCTGAAGAAAGGGCCCGCAGGGCCCTGAAGAAGGGCCCTTTTTTTTACTAGAGCTCGGTACCAAATTCAGAAAAGAGGCCTCCCGAAAGGGGGCCCTTTTTTCGTTTTGGTCC<br>(Scar, Scaffold, anti-repeat, bulge, Terminator L3S2P21) |
| tracrRNA-R2L3 | tracrRNA<br>(This study) | CTAGAGGAACCATTGAGGAGGCCAAGTCCAGCTAAGGCTAGTCCGTTATCAACTTGAAAAAGTGGCACCAGTTCGGTGCAGGGCCCTGAAGAAGGGCCCAAGGCTAGGGCCCTGAAGAAGGGCCCGCAGGGCCCTGAAGAAGGGCCCTTTTTTTTACTAGAGCTCGGTACCAAATTCAGAAAAGAGGCCTCCCGAAAGGGGGCCCTTTTTTCGTTTTGGTCC<br>(Scar, Scaffold, anti-repeat, bulge, Terminator L3S2P21)       |
| tracrRNA-R2L5 | tracrRNA<br>(This study) | CTAGAGGAACCATTGAGGAGGCCAAGTCCAGCTAAGGCTAGTCCGTTATCAACTTGAAAAAGTGGCACCAGTTCGGTGCAGGGCCCTGAAGAAGGGCCCAAGGCTAGGGCCCTGAAGAAGGGCCCGCAGGGCCCTGAAGAAGGGCCCTTTTTTTTACTAGAGCTCGGTACCAAATTCAGAAAAGAGGCCTCCCGAAAGGGGGCCCTTTTTTCGTTTTGGTCC<br>(Scar, Scaffold, anti-repeat, bulge, Terminator L3S2P21)       |
| tracrRNA-R2L7 | tracrRNA<br>(This study) | CTAGAGGAACCATTGGAGGCCAAGTCCAGCTAAGGCTAGTCCGTTATCAACTTGAAAAAGTGGCACCAGTTCGGTGCAGGGCCCTGAAGAAGGGCCCAAGGCTAGGGCCCTGAAGAAGGGCCCGCAGGGCCCTGAAGAAGGGCCCTTTTTTTTACTAGAGCTCGGTACCAAATTCAGAAAAGAGGCCTCCCGAAAGGGGGCCCTTTTTTCGTTTTGGTCC<br>(Scar, Scaffold, anti-repeat, bulge, Terminator L3S2P21)         |
| tracrRNA-R2L9 | tracrRNA<br>(This study) | CTAGAGGAACCATTAGGCCAAGTCCAGCTAAGGCTAGTCCGTTATCAACTTGAAAAAGTGGCACCAGTTCGGTGCAGGGCCCTGAAGAAGGGCCCAAGGCTAGGGCCCTGAAGAAGGGCCCGCAGGGCCCTGAAGAAGGGCCCTTTTTTTTACTAGAGCTCGGTACCAAATTCAGAAAAGAGGCCTCCCGAAAGGGGGCCCTTTTTTCGTTTTGGTCC                                                                       |

| Part name      | Type and source          | DNA sequence (5'– 3')                                                                                                                                                                                                                                                                                                                                                                                                                                                                                                                                                                                                                                                                                                                                                                                                                                                                                                                             |
|----------------|--------------------------|---------------------------------------------------------------------------------------------------------------------------------------------------------------------------------------------------------------------------------------------------------------------------------------------------------------------------------------------------------------------------------------------------------------------------------------------------------------------------------------------------------------------------------------------------------------------------------------------------------------------------------------------------------------------------------------------------------------------------------------------------------------------------------------------------------------------------------------------------------------------------------------------------------------------------------------------------|
|                |                          | ( <a href="#">Scar</a> , <a href="#">Scaffold</a> , <a href="#">anti-repeat</a> , <a href="#">bulge</a> , <a href="#">Terminator</a> L3S2P21)                                                                                                                                                                                                                                                                                                                                                                                                                                                                                                                                                                                                                                                                                                                                                                                                     |
| tracrRNA-R2L11 | tracrRNA<br>(This study) | <a href="#">CTAGAGGAACCATTGCCAAGTCCAGCTAAGGCTAGTCCGTTATCAACTTGAAAAAGTGGCA</a><br><a href="#">CCGAGTCGGTGC GGGCCCTGAAGAAGGGCCCAAGGCTAGGGCCCTGAAGAAGGGCCCCGCAG</a><br><a href="#">GGCCCTGAAGAAGGGCCCTTTTTTTTACTAGAGCTCGGTACCAAATTCAGAAAAGAGGCC</a><br><a href="#">TCCCGAAAGGGGGCCCTTTTTTCGTTTTGGTCC</a><br>( <a href="#">Scar</a> , <a href="#">Scaffold</a> , <a href="#">anti-repeat</a> , <a href="#">bulge</a> , <a href="#">Terminator</a> L3S2P21)                                                                                                                                                                                                                                                                                                                                                                                                                                                                                            |
| tracrRNA-R3L1  | tracrRNA<br>(This study) | <a href="#">CTAGAGGAACCATTGGTGGTCTTGACCAAGTAGCGTTAAGGCTAGTCCGTTATCAACTTGA</a><br><a href="#">AAAAGTGGCACCAGTTCGGTGC GGGCCCTGAAGAAGGGCCCAAGGCTAGGGCCCTGAAGAA</a><br><a href="#">GGGCCCGCAGGGCCCTGAAGAAGGGCCCTTTTTTTTACTAGAGCTCGGTACCAAATTCAG</a><br><a href="#">AAAAGAGGCCTCCCGAAAGGGGGCCCTTTTTTCGTTTTGGTCC</a><br>( <a href="#">Scar</a> , <a href="#">Scaffold</a> , <a href="#">anti-repeat</a> , <a href="#">bulge</a> , <a href="#">Terminator</a> L3S2P21)                                                                                                                                                                                                                                                                                                                                                                                                                                                                                   |
| tracrRNA-R3L3  | tracrRNA<br>(This study) | <a href="#">CTAGAGGAACCATTGGTCTTGACCAAGTAGCGTTAAGGCTAGTCCGTTATCAACTTGAAA</a><br><a href="#">AAGTGGCACCAGTTCGGTGC GGGCCCTGAAGAAGGGCCCAAGGCTAGGGCCCTGAAGAAGG</a><br><a href="#">GCCCCAGGGCCCTGAAGAAGGGCCCTTTTTTTTACTAGAGCTCGGTACCAAATTCAGAA</a><br><a href="#">AAGAGGCCTCCCGAAAGGGGGCCCTTTTTTCGTTTTGGTCC</a><br>( <a href="#">Scar</a> , <a href="#">Scaffold</a> , <a href="#">anti-repeat</a> , <a href="#">bulge</a> , <a href="#">Terminator</a> L3S2P21)                                                                                                                                                                                                                                                                                                                                                                                                                                                                                       |
| tracrRNA-R3L5  | tracrRNA<br>(This study) | <a href="#">CTAGAGGAACCATTGTCTTGACCAAGTAGCGTTAAGGCTAGTCCGTTATCAACTTGAAAA</a><br><a href="#">GTGGCACCAGTTCGGTGC GGGCCCTGAAGAAGGGCCCAAGGCTAGGGCCCTGAAGAAGGGC</a><br><a href="#">CCGCAGGGCCCTGAAGAAGGGCCCTTTTTTTTACTAGAGCTCGGTACCAAATTCAGAAAA</a><br><a href="#">GAGGCCTCCCGAAAGGGGGCCCTTTTTTCGTTTTGGTCC</a><br>( <a href="#">Scar</a> , <a href="#">Scaffold</a> , <a href="#">anti-repeat</a> , <a href="#">bulge</a> , <a href="#">Terminator</a> L3S2P21)                                                                                                                                                                                                                                                                                                                                                                                                                                                                                        |
| tracrRNA-R3L7  | tracrRNA<br>(This study) | <a href="#">CTAGAGGAACCATTCTTGACCAAGTAGCGTTAAGGCTAGTCCGTTATCAACTTGAAAAAGT</a><br><a href="#">GGCACCAGTTCGGTGC GGGCCCTGAAGAAGGGCCCAAGGCTAGGGCCCTGAAGAAGGGCCC</a><br><a href="#">GCAGGGCCCTGAAGAAGGGCCCTTTTTTTTACTAGAGCTCGGTACCAAATTCAGAAAAGA</a><br><a href="#">GGCCTCCCGAAAGGGGGCCCTTTTTTCGTTTTGGTCC</a><br>( <a href="#">Scar</a> , <a href="#">Scaffold</a> , <a href="#">anti-repeat</a> , <a href="#">bulge</a> , <a href="#">Terminator</a> L3S2P21)                                                                                                                                                                                                                                                                                                                                                                                                                                                                                         |
| tracrRNA-R3L9  | tracrRNA<br>(This study) | <a href="#">CTAGAGGAACCATTTGACCAAGTAGCGTTAAGGCTAGTCCGTTATCAACTTGAAAAAGTGG</a><br><a href="#">CACCAGTTCGGTGC GGGCCCTGAAGAAGGGCCCAAGGCTAGGGCCCTGAAGAAGGGCCCCG</a><br><a href="#">AGGGCCCTGAAGAAGGGCCCTTTTTTTTACTAGAGCTCGGTACCAAATTCAGAAAAGAGG</a><br><a href="#">CCTCCCGAAAGGGGGCCCTTTTTTCGTTTTGGTCC</a><br>( <a href="#">Scar</a> , <a href="#">Scaffold</a> , <a href="#">anti-repeat</a> , <a href="#">bulge</a> , <a href="#">Terminator</a> L3S2P21)                                                                                                                                                                                                                                                                                                                                                                                                                                                                                           |
| tracrRNA-R3L11 | tracrRNA<br>(This study) | <a href="#">CTAGAGGAACCATTACCAAGTAGCGTTAAGGCTAGTCCGTTATCAACTTGAAAAAGTGGCA</a><br><a href="#">CCGAGTCGGTGC GGGCCCTGAAGAAGGGCCCAAGGCTAGGGCCCTGAAGAAGGGCCCCGCAG</a><br><a href="#">GGCCCTGAAGAAGGGCCCTTTTTTTTACTAGAGCTCGGTACCAAATTCAGAAAAGAGGCC</a><br><a href="#">TCCCGAAAGGGGGCCCTTTTTTCGTTTTGGTCC</a><br>( <a href="#">Scar</a> , <a href="#">Scaffold</a> , <a href="#">anti-repeat</a> , <a href="#">bulge</a> , <a href="#">Terminator</a> L3S2P21)                                                                                                                                                                                                                                                                                                                                                                                                                                                                                            |
| tracrRNA-Ar1   | tracrRNA<br>(This study) | <a href="#">CTAGAGGAACCATTAGCTGCAATGGCGCAAGTACCGTTAAGGCTAGTCCGTTATCAACTTG</a><br><a href="#">AAAAAGTGGCACCAGTTCGGTGC GGGCCCTGAAGAAGGGCCCAAGGCTAGGGCCCTGAAGA</a><br><a href="#">AGGGCCCGCAGGGCCCTGAAGAAGGGCCCTTTTTTTTACTAGAGCTCGGTACCAAATTCCA</a><br><a href="#">GAAAAGAGGCCTCCCGAAAGGGGGCCCTTTTTTCGTTTTGGTCC</a><br>( <a href="#">Scar</a> , <a href="#">Scaffold</a> , <a href="#">anti-repeat</a> , <a href="#">bulge</a> , <a href="#">Terminator</a> L3S2P21)                                                                                                                                                                                                                                                                                                                                                                                                                                                                                 |
| tracrRNA-Ar2   | tracrRNA<br>(This study) | <a href="#">CTAGAGGAACCATTAAATGGTAATGTTGCAAGTATATCTAAGGCTAGTCCGTTATCAACTTG</a><br><a href="#">AAAAAGTGGCACCAGTTCGGTGC GGGCCCTGAAGAAGGGCCCAAGGCTAGGGCCCTGAAGA</a><br><a href="#">AGGGCCCGCAGGGCCCTGAAGAAGGGCCCTTTTTTTTACTAGAGCTCGGTACCAAATTCCA</a><br><a href="#">GAAAAGAGGCCTCCCGAAAGGGGGCCCTTTTTTCGTTTTGGTCC</a><br>( <a href="#">Scar</a> , <a href="#">Scaffold</a> , <a href="#">anti-repeat</a> , <a href="#">bulge</a> , <a href="#">Terminator</a> L3S2P21)                                                                                                                                                                                                                                                                                                                                                                                                                                                                                |
| mRFP           | mRNA<br>(This study)     | <a href="#">CTAGAGCATTAAAGAGGAGAAA</a> <a href="#">TACTAG</a> <a href="#">ATGGTGAGCAAGGGCGAGGAGGATAACATGGCCA</a><br><a href="#">TCATCAAGGAGTTCATGCGCTTCAAGGTGCACATGGAGGGCTCCGTGAACGGCCACGAGTT</a><br><a href="#">CGAGATCGAGGGCGAGGGCGAGGGCCCTACGAGGGCCACCCAGACCAGCCCAAGCTGAAG</a><br><a href="#">GTGACCAAGGGTGGCCCCCTGCCCTTCGCCTGGGACATCCTGTCCCCCAGTTCATGTACG</a><br><a href="#">GCTCCAAGGCCTACGTGAAGCACCCCGCCGACATCCCCGACTACTTGAAGCTGTCCTCCC</a><br><a href="#">CGAGGGCTTCAAGTGGGAGCGCGTGATGAACTTCGAGGACGGCGGCGTGGTGACCGTGACC</a><br><a href="#">CAGGACTCCTCACTTCAGGACGGCGAGTTCATCTACAAGGTGAAGCTGCCGGCCACCAACT</a><br><a href="#">TCCCCTCGACGGCCCCGTAATGCAGAAGAAGACCATGGGCTGGGAGGCCTCCTCCGAGCG</a><br><a href="#">GATGTACCCCGAGGACGGCCCTGAAGGGCGAGATCAAGCAGAGGCTGAAGCTGAAGGAC</a><br><a href="#">GGCGCCACTACGACGCTGAGGTCAAGACCACCTACAAGGCCAAGAAGCCCGTGCAGCTGC</a><br><a href="#">CCGGCGCTACAACGTCAACATCAAGTTGGACATCACCTCCACAACGAGGACTACACCAT</a> |

| Part name | Type and source       | DNA sequence (5'– 3')                                                                                                                                                                                                                                                                                                                                                                                                                                                                                                                                                                                                                                                                                                                                                                                                                                                                                                                                                                                                                                                                                                                                                                                                                                                                                                                                                                                                                                                                                                                                                                                                                                                                                                                                                                                                                                                                                                                                                                                                                                                                                                                                                                                                                                                                                                                                                                                                                     |
|-----------|-----------------------|-------------------------------------------------------------------------------------------------------------------------------------------------------------------------------------------------------------------------------------------------------------------------------------------------------------------------------------------------------------------------------------------------------------------------------------------------------------------------------------------------------------------------------------------------------------------------------------------------------------------------------------------------------------------------------------------------------------------------------------------------------------------------------------------------------------------------------------------------------------------------------------------------------------------------------------------------------------------------------------------------------------------------------------------------------------------------------------------------------------------------------------------------------------------------------------------------------------------------------------------------------------------------------------------------------------------------------------------------------------------------------------------------------------------------------------------------------------------------------------------------------------------------------------------------------------------------------------------------------------------------------------------------------------------------------------------------------------------------------------------------------------------------------------------------------------------------------------------------------------------------------------------------------------------------------------------------------------------------------------------------------------------------------------------------------------------------------------------------------------------------------------------------------------------------------------------------------------------------------------------------------------------------------------------------------------------------------------------------------------------------------------------------------------------------------------------|
|           |                       | CGTGGAACAGTACGAACGCGCTGAGGGCCGCCACTCCACCGGCGGCATGGACGAGCTGTAC<br>AAGTAAACCAATTATTGAAGGGGAGCGGGAAACCGCTCCCCTTTTTTTGTTTCTGGTCTCCC<br>(Scar, coding, Terminator L3S3P00)                                                                                                                                                                                                                                                                                                                                                                                                                                                                                                                                                                                                                                                                                                                                                                                                                                                                                                                                                                                                                                                                                                                                                                                                                                                                                                                                                                                                                                                                                                                                                                                                                                                                                                                                                                                                                                                                                                                                                                                                                                                                                                                                                                                                                                                                     |
| mRFP-ΔRBS | mRNA<br>(This study)  | CTAGAGGTGAGCAAGGGCGAGGAGGATAACATGGCCATCATCAAGGAGTTCATGCGCTTCA<br>AGGTGCACATGGAGGGCTCCGTGAACGGCCACGAGTTCGAGATCGAGGGCGAGGGCGAGGG<br>CCGCCCTACGAGGGCACCCAGACCGCCAAGCTGAAGGTGACCAAGGGTGCCCCCTGCC<br>TTCGCCCTGGGACATCCTGTCCCCTCAGTTCATGTACGGCTCCAAGGCCACGTGAAGCACC<br>CCGCCGACATCCCCGACTACTTGAAGCTGTCCTTCCCCGAGGGCTTCAAGTGGGAGCGCGT<br>GATGAACTTCGAGGACGGCGGCGTGGTGACCGTGACCCAGGACTCCTCACTTCAGGACGGC<br>GAGTTCATCTACAAGGTGAAGCTGCGCGGCACCAACTTCCCCTCCGACGGCCCCGTAATGC<br>AGAAGAAGACCATGGGCTGGGAGGCCCTCCTCCGAGCGGATGTACCCCGAGGACGGCGCCCT<br>GAAGGGCGAGATCAAGCAGAGGCTGAAGCTGAAGGACGGCGGCCACTACGACGCTGAGGTC<br>AAGACCACCTACAAGGCCAAGAAGCCCGTGCAGCTGCCGGCGCCTACACGTCAACATCA<br>AGTTGGACATCACCTCCACAACGAGGACTACACCATCGTGAACAGTACGAACGCGCTGA<br>GGGCCGCACTCCACCGGCGGCATGGACGAGCTGTACAAGTAAACCAATTATTGAAGGGGAG<br>CGGGAAACCGCTCCCCTTTTTTTGTTTCTGGTCTCCC<br>(Scar, partial coding, Terminator L3S3P00)                                                                                                                                                                                                                                                                                                                                                                                                                                                                                                                                                                                                                                                                                                                                                                                                                                                                                                                                                                                                                                                                                                                                                                                                                                                                                                                                                                                                                                                                                                                                                 |
| crRNA-R1  | crRNA<br>(This study) | CTAGACCAGGACTCCTCACTTCAGGACGGCGAGTTCATCTACAAGGTACTAGAGCCAATT<br>ATTGAAGGGGAGCGGGAAACCGCTCCCCTTTTTTTGTTTCTGGTCTCCC<br>(Scar, Terminator L3S3P00)                                                                                                                                                                                                                                                                                                                                                                                                                                                                                                                                                                                                                                                                                                                                                                                                                                                                                                                                                                                                                                                                                                                                                                                                                                                                                                                                                                                                                                                                                                                                                                                                                                                                                                                                                                                                                                                                                                                                                                                                                                                                                                                                                                                                                                                                                           |
| crRNA-R2  | crRNA<br>(This study) | CTAGATAATGCAGAAGAAGACCATGGGCTGGGAGGCCCTCCTCCGAGCTACTAGAGCCAATT<br>ATTGAAGGGGAGCGGGAAACCGCTCCCCTTTTTTTGTTTCTGGTCTCCC<br>(Scar, Terminator L3S3P00)                                                                                                                                                                                                                                                                                                                                                                                                                                                                                                                                                                                                                                                                                                                                                                                                                                                                                                                                                                                                                                                                                                                                                                                                                                                                                                                                                                                                                                                                                                                                                                                                                                                                                                                                                                                                                                                                                                                                                                                                                                                                                                                                                                                                                                                                                         |
| crRNA-R3  | crRNA<br>(This study) | CTAGATGAAGGACGGCGGCCACTACGACGCTGAGGTCAAGACCACCTTACTAGAGCCAATT<br>ATTGAAGGGGAGCGGGAAACCGCTCCCCTTTTTTTGTTTCTGGTCTCCC<br>(Scar, Terminator L3S3P00)                                                                                                                                                                                                                                                                                                                                                                                                                                                                                                                                                                                                                                                                                                                                                                                                                                                                                                                                                                                                                                                                                                                                                                                                                                                                                                                                                                                                                                                                                                                                                                                                                                                                                                                                                                                                                                                                                                                                                                                                                                                                                                                                                                                                                                                                                          |
| mRNA-Ar   | mRNA<br>(This study)  | CTAGACAATCAGGAGCGCAATATGTCATTTCTGTTACCCATCCAATTGTTCAAATTCCTTG<br>CTGATGAAACCCGCTCTGGGCATCGTTTTACTGCTCAGCGAACTGGGAGAGTTATGCGTCTG<br>CGATCTCTGCACTGCTCTCGACCAGTCGCAGCCCAAGATCTCCCGCCACCTGGCATTGCTG<br>CGTGAAGCGGGCTATTGCTGGACCGCAAGCAAGGTAAGTGGGTTTATTACCGCTTATCAC<br>CGCATATTCAGCATGGGCGGGCAAAATATTGATGAGGCTGGCGATGTGAACAGGAAAA<br>GGTTCAGCGGATTGTCCGCAACCTGGCTCGACAAAAGTGTCCGGGGACAGTAAGAACATT<br>TGCAGTTAAAAATTTAGCTAAACACATATGAATTTTCAGATGTGTTTTATCCGGGAGGCAT<br>TATGTTACTGGCAGGCGCTATCTTTGCTCCTGACCATCGTATTGGTTACTGGCAGCCGAAA<br>GGTTTTAGGCATCGGCTGGAGTGCAACGCTCGGCGCAGTACTGGCGTTAGTTACGGCGTGG<br>TCCATCCGGGTGATATTCGGTGGTGTGGAATATCGTCTGGAACGCGACGGCTGCGTTTTAT<br>CGCCGTCATTATCATCAGCCTGCTGCTGGATGAGTCCGGCTTTTTTGAATGGGCGGGCGTG<br>CACGTCACGCTGGGGTAATGGTCGTGGTCGCTTGTCTTACCTGGATTGTCTCTGCTCG<br>GTGCTGCCGTTGCCGCCCTGTTTGCCAATGATGGCGCGGGCGCTTATTTTGCACCGATTGT<br>CATCGCCATGCTGCTGGCTTTAGGGTTCAGTAAAGGCATACGCTGGCGTTTCGTGATGGCG<br>GCCGGATTCAATGCCGATACCGCCAGCCTGCCGCTTATTGTCTCCAACCTGGTGAATATCG<br>TTTTCCGCTGATTTCTTTGGCCTCGGCTTTCGCGAATACGCTCGGTGATGGTGGCGGTGGA<br>TATCGCCGCGATTGTTGCCACGCTGGTGATGTTACATCTCTATTTTCGCAAAGATATCCG<br>CAGAACTACGATATGGCGCTGCTGAAATCTCCCGCAGAAGCGATCAAAGATCCTGCTACGT<br>TCAAACCTGGCTGGGTTGTTTTACTGCTTCTGCTGGTGGGATTTTTCTGCTCGGAACCGCT<br>CGGCATTCCGGTGAGCGCCATTGCAGCTGTGGGCGCGCTGATATTATTTGCTGCTCGCTAAA<br>CGCGGTCATGCGATTAATACGGGTAAAGTCTTCCGCGGTGCCCCCTGGCAGATTGTCTATCT<br>TCTCGCTCGGCATGTATCTGGTGGTTTTATGGCCTGCGCAATGCCGATTAAACGGAATATCT<br>TTCTGGCGTACTCAACGTGCTGGCGGATAACGGCCTGTGGGCCGCGACGCTCGGCACCGGA<br>TTCTCACCGCCTTCTCTCTTCTATTATGAACAATATGCCGACGGTACTGGTTGGCGCGT<br>TGTCCATTGATGGCAGCACGGCATCTGGCGTTATCAAAGAAGCGATGGTTTATGCCAATGT<br>GATTGGCTGCGATTTGGGACCGAAAAATACCCCAATTGGTAGCCTGGCTACGCTACTCTGG<br>CTGCACGTACTTTCGCAAGAATATGACTATCAGCTGGGGATATTACTCCGTACAGGGA<br>TTATCATGACCCTGCTGTGCTGTTTTGTGACGCTGGCTGGCTGGCGTACTCTCTCTCTT<br>CACTTTGTAATGAGATACTGATATGAGCAACATTACCAATTTATCACAACCCGGCCTGCGGC<br>ACGTCGCGTAATACGCTGGAGATGATCCGCAACAGCGGCACAGAACCGACTATTATCCATT<br>ATCTGGAACCTCCGCCAACGCGCGATGAACTGGTCAAACCTCATTGCCGATATGGGGATTTT<br>CGTACGCGCGCTGCTGCTAAAAACGTCGAACCGTATGAGGAGCTGGGCTTGCAGGAAGAT<br>AAATTTACTGACGATCGGTTAATCGACTTTATGCTTCAGCACCCGATTCGATTAATCGCC<br>CGATTGTGGTGACGCCGCTGGGAACTCGCTGTGCCGCCCTCAGAAGTGGTGTGGAAT<br>TCTGCCAGATGCGCAAAAAGGCGCATTTCTCCAAGGAAGATGGCGAGAAAAGTGGTTGATGAA<br>GCGGGTAAGCGCTGAAATAACTAGAGCCAATTATTGAAGGGGAGCGGGAAACCGCTCC<br>CTTTTTTTGTTTCTGGTCTCCC |

| Part name        | Type and source          | DNA sequence (5'– 3')                                                                                                                                                                                                                                                                                                                      |
|------------------|--------------------------|--------------------------------------------------------------------------------------------------------------------------------------------------------------------------------------------------------------------------------------------------------------------------------------------------------------------------------------------|
|                  |                          | ( <a href="#">Scar</a> , <a href="#">Terminator L3S3P00</a> )                                                                                                                                                                                                                                                                              |
| crRNA-Ar1        | crRNA<br>(This study)    | <a href="#">CTAGA</a> GTCCCTGGAACCGCTCGGCATTCCGGTGAGCGCCATTGCAGCTTACTAGAGCCAATT<br>ATTGAAGGGGAGCGGGAAACCGCTCCCCTTTTTTTGTTTCTGGTCTCCC<br>( <a href="#">Scar</a> , <a href="#">Terminator L3S3P00</a> )                                                                                                                                      |
| crRNA-Ar2        | crRNA<br>(This study)    | <a href="#">CTAGA</a> CTAGATTCACTTTGTAAATGAGATACTGATATGAGCAACATTACCATTTACTAGAGC<br>CAATTATTGAAGGGGAGCGGGAAACCGCTCCCCTTTTTTTGTTTCTGGTCTCCC<br>( <a href="#">Scar</a> , <a href="#">Terminator L3S3P00</a> )                                                                                                                                 |
| crRNA-Ar3        | crRNA<br>(This study)    | <a href="#">CTAGA</a> CTAGATGCTGCGTAAAAACGTCGAACCGTATGAGGAGCTGGGCCTTGTACTAGAGC<br>CAATTATTGAAGGGGAGCGGGAAACCGCTCCCCTTTTTTTGTTTCTGGTCTCCC<br>( <a href="#">Scar</a> , <a href="#">Terminator L3S3P00</a> )                                                                                                                                  |
| crRNA-Ar4        | crRNA<br>(This study)    | <a href="#">CTAGA</a> CTAGAAAGGCGCATTCTCCAAGGAAGATGGCGAGAAAGTGGTTGATGTACTAGAGC<br>CAATTATTGAAGGGGAGCGGGAAACCGCTCCCCTTTTTTTGTTTCTGGTCTCCC<br>( <a href="#">Scar</a> , <a href="#">Terminator L3S3P00</a> )                                                                                                                                  |
| s-crRNA-LEB3     | crRNA<br>(This study)    | <a href="#">CTAGA</a> CATAGTTTCGTTTTCCCATGTTTTAGAGCTATGCCCAATTATTGAAGGCCGCTAACGC<br>GGCCTTTTTTTGTTTCTGGTCTCCC<br>( <a href="#">Scar</a> , <a href="#">Terminator L3S3P22</a> )                                                                                                                                                             |
| s-crRNA-LEA2-WT  | crRNA<br>(This study)    | <a href="#">CTAGA</a> AGTTATTATATAGTTCGGTCGTTTTAGAGCTATGCCCAATTATTGAAGGCCGCTAA<br>CGCGGCCTTTTTTTGTTTCTGGTCTCCC<br>( <a href="#">Scar</a> , <a href="#">Terminator L3S3P22</a> )                                                                                                                                                            |
| s-crRNA-LEA2-C6  | crRNA<br>(This study)    | <a href="#">CTAGA</a> AGTTATTATATAGTTCGGTCTACGTACCGGGTGAAACCAATTATTGAAGGCCGCTAA<br>CGCGGCCTTTTTTTGTTTCTGGTCTCCC<br>( <a href="#">Scar</a> , <a href="#">Terminator L3S3P22</a> )                                                                                                                                                           |
| s-crRNA-LEA2-C9  | crRNA<br>(This study)    | <a href="#">CTAGA</a> AGTTATTATATAGTTCGGTCAGAATCCTCGCTCAGCCAATTATTGAAGGCCGCTAA<br>CGCGGCCTTTTTTTGTTTCTGGTCTCCC<br>( <a href="#">Scar</a> , <a href="#">Terminator L3S3P22</a> )                                                                                                                                                            |
| s-crRNA-LEA2-C48 | crRNA<br>(This study)    | <a href="#">CTAGA</a> AGTTATTATATAGTTCGGTCATTATTGCCGACACACCAATTATTGAAGGCCGCTAA<br>CGCGGCCTTTTTTTGTTTCTGGTCTCCC<br>( <a href="#">Scar</a> , <a href="#">Terminator L3S3P22</a> )                                                                                                                                                            |
| s-crRNA-LEA2-C74 | crRNA<br>(This study)    | <a href="#">CTAGA</a> AGTTATTATATAGTTCGGTCAATCGGGAGCTGCCTCCAATTATTGAAGGCCGCTAA<br>CGCGGCCTTTTTTTGTTTCTGGTCTCCC<br>( <a href="#">Scar</a> , <a href="#">Terminator L3S3P22</a> )                                                                                                                                                            |
| s-tracrRNA-WT    | tracrRNA<br>(This study) | <a href="#">CTAG</a> GCATAGCAAGTTAAAAAATAGGCTAGTCCGTTATCAACTTGAAAAAGTGGCACCGAGT<br>CGGTGCGGGCCCTGAAGAAGGGCCCAAGGCTAGGGCCCTGAAGAAGGGCCCGCAGGGCCCT<br>GAAGAAGGGCCCTTTTTTTTACTAGAGCTCGGTACCAAATTCAGAAAAGAGGCCTCCCGA<br>AAGGGGGCCTTTTTTCGTTTTGGTCC<br>( <a href="#">Scar</a> , <a href="#">Scaffold</a> , <a href="#">Terminator L3S2P21</a> ) |
| s-tracrRNA-C6    | tracrRNA<br>(This study) | <a href="#">CTAG</a> TTCACCCAAGTTACGTTAAGGCTAGTCCGTTATCAACTTGAAAAAGTGGCACCGAGT<br>CGGTGCGGGCCCTGAAGAAGGGCCCAAGGCTAGGGCCCTGAAGAAGGGCCCGCAGGGCCCT<br>GAAGAAGGGCCCTTTTTTTTACTAGAGCTCGGTACCAAATTCAGAAAAGAGGCCTCCCGA<br>AAGGGGGCCTTTTTTCGTTTTGGTCC<br>( <a href="#">Scar</a> , <a href="#">Scaffold</a> , <a href="#">Terminator L3S2P21</a> )  |
| s-tracrRNA-C9    | tracrRNA<br>(This study) | <a href="#">CTAG</a> CTGAGCGAAGTGATTCTAAGGCTAGTCCGTTATCAACTTGAAAAAGTGGCACCGAGT<br>CGGTGCGGGCCCTGAAGAAGGGCCCAAGGCTAGGGCCCTGAAGAAGGGCCCGCAGGGCCCT<br>GAAGAAGGGCCCTTTTTTTTACTAGAGCTCGGTACCAAATTCAGAAAAGAGGCCTCCCGA<br>AAGGGGGCCTTTTTTCGTTTTGGTCC<br>( <a href="#">Scar</a> , <a href="#">Scaffold</a> , <a href="#">Terminator L3S2P21</a> )  |
| s-tracrRNA-C48   | tracrRNA<br>(This study) | <a href="#">CTAG</a> TGTGTCGAAGTAATAATAAGGCTAGTCCGTTATCAACTTGAAAAAGTGGCACCGAGT<br>CGGTGCGGGCCCTGAAGAAGGGCCCAAGGCTAGGGCCCTGAAGAAGGGCCCGCAGGGCCCT<br>GAAGAAGGGCCCTTTTTTTTACTAGAGCTCGGTACCAAATTCAGAAAAGAGGCCTCCCGA<br>AAGGGGGCCTTTTTTCGTTTTGGTCC<br>( <a href="#">Scar</a> , <a href="#">Scaffold</a> , <a href="#">Terminator L3S2P21</a> )  |
| s-tracrRNA-C74   | tracrRNA<br>(This study) | <a href="#">CTAG</a> AGGCAGCAAGTCCGATTAAAGGCTAGTCCGTTATCAACTTGAAAAAGTGGCACCGAGT<br>CGGTGCGGGCCCTGAAGAAGGGCCCAAGGCTAGGGCCCTGAAGAAGGGCCCGCAGGGCCCT                                                                                                                                                                                           |

| Part name     | Type and source          | DNA sequence (5'– 3')                                                                                                                                                                                                                                                                                                                                                                                                                                         |
|---------------|--------------------------|---------------------------------------------------------------------------------------------------------------------------------------------------------------------------------------------------------------------------------------------------------------------------------------------------------------------------------------------------------------------------------------------------------------------------------------------------------------|
|               |                          | <a href="#">GAAGAAGGGCCCTTTTTTTTACTAGAGCTCGGTACCAAATTCAGAAAAGAGGCCTCCCGA</a><br><a href="#">AAGGGGGCCCTTTTTTCGTTTTGGTCC</a><br>( <a href="#">Scar</a> , <a href="#">Scaffold</a> , <a href="#">Terminator L3S2P21</a> )                                                                                                                                                                                                                                       |
| s-tracrRNA-R1 | tracrRNA<br>(This study) | <a href="#">CCTTGTAGATGAACAAGTGCCGTTAAGGCTAGTCCGTTATCAACTTGAAAAAGTGGCACCG</a><br><a href="#">AGTCGGTGCGGGCCCTGAAGAAGGGCCCAAGGCTAGGGCCCTGAAGAAGGGCCCGCAGGGC</a><br><a href="#">CCTGAAGAAGGGCCCTTTTTTTTACTAGAGCTCGGTACCAAATTCAGAAAAGAGGCCTCC</a><br><a href="#">CGAAAGGGGGCCCTTTTTTCGTTTTGGTCC</a><br>( <a href="#">Scar</a> , <a href="#">Scaffold</a> , <a href="#">Terminator L3S2P21</a> )                                                                  |
| s-tracrRNA-R2 | tracrRNA<br>(This study) | <a href="#">GCTCGGAGGAGGCCAAGTCCAGCTAAGGCTAGTCCGTTATCAACTTGAAAAAGTGGCACCG</a><br><a href="#">AGTCGGTGCGGGCCCTGAAGAAGGGCCCAAGGCTAGGGCCCTGAAGAAGGGCCCGCAGGGC</a><br><a href="#">CCTGAAGAAGGGCCCTTTTTTTTACTAGAGCTCGGTACCAAATTCAGAAAAGAGGCCTCC</a><br><a href="#">CGAAAGGGGGCCCTTTTTTCGTTTTGGTCC</a><br>( <a href="#">Scar</a> , <a href="#">Scaffold</a> , <a href="#">Terminator L3S2P21</a> )                                                                  |
| s-tracrRNA-R3 | tracrRNA<br>(This study) | <a href="#">AGGTGGTCTTGACCAAGTAGCGTTAAGGCTAGTCCGTTATCAACTTGAAAAAGTGGCACCG</a><br><a href="#">AGTCGGTGCGGGCCCTGAAGAAGGGCCCAAGGCTAGGGCCCTGAAGAAGGGCCCGCAGGGC</a><br><a href="#">CCTGAAGAAGGGCCCTTTTTTTTACTAGAGCTCGGTACCAAATTCAGAAAAGAGGCCTCC</a><br><a href="#">CGAAAGGGGGCCCTTTTTTCGTTTTGGTCC</a><br>( <a href="#">Scar</a> , <a href="#">Scaffold</a> , <a href="#">Terminator L3S2P21</a> )                                                                  |
| CONAN         | Sensor RNA               | <a href="#">TTGCCATGTGTATGTGGGAGACGGTCGGGTCCAGATATTCGTATCTGTGCGAGTAGAGTGTG</a><br><a href="#">GGCTCCACATACTCTGATGATCCTTCGGGATCATTCAATGCGCAA</a> <a href="#">CTGCTGCTTTCAACCT</a><br><a href="#">CGGTGACGAGGTTGAAGAGCAGCAGTTGCCATGTGTATGTGGGAGCCACACTCTACTCGA</a><br><a href="#">CAGATACGTAGCATAACCCCTTGGGGCCTCTAACGGGTCTTGAGGGGTTTTTTG</a><br>( <a href="#">Target</a> , <a href="#">broccoli RNA</a> , <a href="#">PAM</a> , <a href="#">Terminator T7</a> ) |
| s-crRNA-13    | crRNA<br>(This study)    | <a href="#">AGTTATTATATAGTTCGGTCTGTTTTAGAGCTATGCCAATTATTGAAGGCCGCTAACGCGGC</a><br><a href="#">CTTTTTTGTCTTCTGGTCTCCC</a><br>( <a href="#">Spacer</a> , <a href="#">Terminator L3S3P22</a> )                                                                                                                                                                                                                                                                   |
| s-crRNA-12    | crRNA<br>(This study)    | <a href="#">AGTTATTATATAGTTCGGTCTGTTTTAGAGCTATCCAATTATTGAAGGCCGCTAACGCGGCC</a><br><a href="#">TTTTTTGTCTTCTGGTCTCCC</a><br>( <a href="#">Spacer</a> , <a href="#">Terminator L3S3P22</a> )                                                                                                                                                                                                                                                                    |
| s-crRNA-11    | crRNA<br>(This study)    | <a href="#">AGTTATTATATAGTTCGGTCTGTTTTAGAGCTACCAATTATTGAAGGCCGCTAACGCGGCCT</a><br><a href="#">TTTTTTGTCTTCTGGTCTCCC</a><br>( <a href="#">Spacer</a> , <a href="#">Terminator L3S3P22</a> )                                                                                                                                                                                                                                                                    |
| s-crRNA-10    | crRNA<br>(This study)    | <a href="#">AGTTATTATATAGTTCGGTCTGTTTTAGAGCTCCAATTATTGAAGGCCGCTAACGCGGCCTT</a><br><a href="#">TTTTTTGTCTTCTGGTCTCCC</a><br>( <a href="#">Spacer</a> , <a href="#">Terminator L3S3P22</a> )                                                                                                                                                                                                                                                                    |
| s-tracrRNA-13 | tracrRNA<br>(This study) | <a href="#">CATAGCAAGTTAAAATAAGGCTAGTCCGTTATCAACTTGAAAAAGTGGCACCGAGTCCGGTG</a><br><a href="#">CGGGCCCTGAAGAAGGGCCCAAGGCTAGGGCCCTGAAGAAGGGCCCGCAGGGCCCTGAAGA</a><br><a href="#">AGGGCCCTTTTTTTTACTAGAGCTCGGTACCAAATTCAGAAAAGAGGCCTCCCGAAAGGG</a><br><a href="#">GGCCTTTTTTCGTTTTGGTCC</a><br>( <a href="#">Scar</a> , <a href="#">Scaffold</a> , <a href="#">Terminator L3S2P21</a> )                                                                          |
| s-tracrRNA-12 | tracrRNA<br>(This study) | <a href="#">ATAGCAAGTTAAAATAAGGCTAGTCCGTTATCAACTTGAAAAAGTGGCACCGAGTCCGGTGC</a><br><a href="#">GGCCCTGAAGAAGGGCCCAAGGCTAGGGCCCTGAAGAAGGGCCCGCAGGGCCCTGAAGAA</a><br><a href="#">GGCCCTTTTTTTTACTAGAGCTCGGTACCAAATTCAGAAAAGAGGCCTCCCGAAAGGGG</a><br><a href="#">GCCTTTTTTCGTTTTGGTCC</a><br>( <a href="#">Scar</a> , <a href="#">Scaffold</a> , <a href="#">Terminator L3S2P21</a> )                                                                             |
| s-tracrRNA-11 | tracrRNA<br>(This study) | <a href="#">TAGCAAGTTAAAATAAGGCTAGTCCGTTATCAACTTGAAAAAGTGGCACCGAGTCCGGTGCG</a><br><a href="#">GGCCCTGAAGAAGGGCCCAAGGCTAGGGCCCTGAAGAAGGGCCCGCAGGGCCCTGAAGAA</a><br><a href="#">GGCCCTTTTTTTTACTAGAGCTCGGTACCAAATTCAGAAAAGAGGCCTCCCGAAAGGGG</a><br><a href="#">GCCTTTTTTCGTTTTGGTCC</a><br>( <a href="#">Scar</a> , <a href="#">Scaffold</a> , <a href="#">Terminator L3S2P21</a> )                                                                             |
| s-tracrRNA-10 | tracrRNA<br>(This study) | <a href="#">AGCAAGTTAAAATAAGGCTAGTCCGTTATCAACTTGAAAAAGTGGCACCGAGTCCGGTGCGG</a><br><a href="#">GCCCTGAAGAAGGGCCCAAGGCTAGGGCCCTGAAGAAGGGCCCGCAGGGCCCTGAAGAA</a><br><a href="#">GCCCTTTTTTTTACTAGAGCTCGGTACCAAATTCAGAAAAGAGGCCTCCCGAAAGGGGG</a><br><a href="#">CCTTTTTTCGTTTTGGTCC</a><br>( <a href="#">Scar</a> , <a href="#">Scaffold</a> , <a href="#">Terminator L3S2P21</a> )                                                                               |

| Part name        | Type and source          | DNA sequence (5'– 3')                                                                                                                                                                                                                                                                                                                       |
|------------------|--------------------------|---------------------------------------------------------------------------------------------------------------------------------------------------------------------------------------------------------------------------------------------------------------------------------------------------------------------------------------------|
| s-tracrRNA-Ar2   | tracrRNA<br>(This study) | AATGGTAATGTTGCAAGTATATCTAAGGCTAGTCCGTTATCAACTTGAAAAAGTGGCACCG<br>AGTCGGTGCGGGCCCTGAAGAAGGGCCCAAGGCTAGGGCCCTGAAGAAGGGCCCGCAGGGC<br>CCTGAAGAAGGGCCCTTTTTTTTACTAGAGCTCGGTACCAAATTCAGAAAAGAGGCCTCC<br>CGAAAGGGGGCCTTTTTTCGTTTTGGTCC<br>( <a href="#">Scar</a> , <a href="#">Scaffold</a> , <a href="#">Terminator L3S2P21</a> )                 |
| tracrRNA- Ar3    | tracrRNA<br>(This study) | CTAGAGGAACCATTCAAGGCCAGCTCCAAGTATACGTAAGGCTAGTCCGTTATCAACTTG<br>AAAAAGTGGCACCGAGTCGGTGCGGGCCCTGAAGAAGGGCCCAAGGCTAGGGCCCTGAAGA<br>AGGGCCCGCAGGGCCCTGAAGAAGGGCCCTTTTTTTTACTAGAGCTCGGTACCAAATTC<br>GAAAAGAGGCCTCCCGAAAGGGGGCCTTTTTTCGTTTTGGTCC<br>( <a href="#">Scar</a> , <a href="#">Scaffold</a> , <a href="#">Terminator L3S2P21</a> )     |
| tracrRNA- Ar4    | tracrRNA<br>(This study) | CTAGAGGAACCATTCAATCAACCACCTTTCAAGTGCCATTAAAGGCTAGTCCGTTATCAACTTG<br>AAAAAGTGGCACCGAGTCGGTGCGGGCCCTGAAGAAGGGCCCAAGGCTAGGGCCCTGAAGA<br>AGGGCCCGCAGGGCCCTGAAGAAGGGCCCTTTTTTTTACTAGAGCTCGGTACCAAATTC<br>GAAAAGAGGCCTCCCGAAAGGGGGCCTTTTTTCGTTTTGGTCC<br>( <a href="#">Scar</a> , <a href="#">Scaffold</a> , <a href="#">Terminator L3S2P21</a> ) |
| tracrRNA- WT-21T | tracrRNA<br>(This study) | CTAGAGGAACCATTCAAACAGCATAGCAAGTTAAAATAAGGCTAGTCCGTTATCAACTTG<br>AAAAAGTGGCACCGAGTCGGTGCGGGCCCTGAAGAAGGGCCCAAGGCTAGGGCCCTGAAGA<br>AGGGCCCGCAGGGCCCTGAAGAAGGGCCCTTTTTTTTACTAGAGCTCGGTACCAAATTC<br>GAAAAGAGGCCTCCCGAAAGGGGGCCTTTTTTCGTTTTGGTCC<br>( <a href="#">Scar</a> , <a href="#">Scaffold</a> , <a href="#">Terminator L3S2P21</a> )     |

**Supplementary Table 9: Sequences of promoters**

| Part name                 | Type and source                                   | DNA sequence (5'– 3')                                                                                                                                                                                                 |
|---------------------------|---------------------------------------------------|-----------------------------------------------------------------------------------------------------------------------------------------------------------------------------------------------------------------------|
| P <sub>pspA</sub> -LEA2B2 | $\sigma^{54}$ -dependent promoter<br>(This study) | AGTTATTATATAGTTCGGTCCGGTTTGGAGACGTTGTTTTGCGGTTAGTGTAATTCGCTAAC<br>TCATCCTGGCATGTTGCTGTTGATTCTTCAATCAGATCTTTATAAATCAAAAAGATAAAAA<br>ATTGGCACGCAAATTGTATTAACAGTTCAGCAGGACAATCCTGAACGCAA<br>(-24 Box, -12 Box, TTS, UAS) |
| P <sub>pspA</sub> -R1     | $\sigma^{54}$ -dependent promoter<br>(This study) | CCCAGGACTCCTCACTTCAGCGGTTAGTGTAATTCGCTAACTCATCCTGGCATGTTGCTGT<br>TGATTCTTCAATCAGATCTTTATAAATCAAAAAGATAAAAAATTGGCACGCAAATTGTATT<br>AACAGTTCAGCAGGACAATCCTGAACGCAA<br>(-24 Box, -12 Box, TTS, UAS)                      |
| P <sub>pspA</sub> -R2     | $\sigma^{54}$ -dependent promoter<br>(This study) | TAATGCAGAAGAAGACCATGCGGTTAGTGTAATTCGCTAACTCATCCTGGCATGTTGCTGT<br>TGATTCTTCAATCAGATCTTTATAAATCAAAAAGATAAAAAATTGGCACGCAAATTGTATT<br>AACAGTTCAGCAGGACAATCCTGAACGCAA<br>(-24 Box, -12 Box, TTS, UAS)                      |
| P <sub>pspA</sub> -R3     | $\sigma^{54}$ -dependent promoter<br>(This study) | TGAAGGACGGCGGCCACTACCGGTTAGTGTAATTCGCTAACTCATCCTGGCATGTTGCTGT<br>TGATTCTTCAATCAGATCTTTATAAATCAAAAAGATAAAAAATTGGCACGCAAATTGTATT<br>AACAGTTCAGCAGGACAATCCTGAACGCAA<br>(-24 Box, -12 Box, TTS, UAS)                      |
| P <sub>pspA</sub> -Ar1    | $\sigma^{54}$ -dependent promoter<br>(This study) | GTCCTGGAACCGCTCGGCATCGGTTAGTGTAATTCGCTAACTCATCCTGGCATGTTGCTGT<br>TGATTCTTCAATCAGATCTTTATAAATCAAAAAGATAAAAAATTGGCACGCAAATTGTATT<br>AACAGTTCAGCAGGACAATCCTGAACGCAA<br>(-24 Box, -12 Box, TTS, UAS)                      |
| P <sub>pspA</sub> -Ar2    | $\sigma^{54}$ -dependent promoter<br>(This study) | TTCACTTTGTAAATGAGATACCGGTTAGTGTAATTCGCTAACTCATCCTGGCATGTTGCTGT<br>TGATTCTTCAATCAGATCTTTATAAATCAAAAAGATAAAAAATTGGCACGCAAATTGTATT<br>AACAGTTCAGCAGGACAATCCTGAACGCAA<br>(-24 Box, -12 Box, TTS, UAS)                     |
| P <sub>pspA</sub> -Ar3    | $\sigma^{54}$ -dependent promoter<br>(This study) | AGTGCTGCGTAAAAACGTCGAAACGGTTAGTGTAATTCGCTAACTCATCCTGGCATGTTGCT<br>GTTGATTCTTCAATCAGATCTTTATAAATCAAAAAGATAAAAAATTGGCACGCAAATTGT<br>TTAACAGTTCAGCAGGACAATCCTGAACGCAA<br>(-24 Box, -12 Box, TTS, UAS)                    |
| P <sub>pspA</sub> -Ar4    | $\sigma^{54}$ -dependent promoter<br>(This study) | AGAAGGCGCATTCTCCAAGGAAACGGTTAGTGTAATTCGCTAACTCATCCTGGCATGTTGCT<br>GTTGATTCTTCAATCAGATCTTTATAAATCAAAAAGATAAAAAATTGGCACGCAAATTGT<br>TTAACAGTTCAGCAGGACAATCCTGAACGCAA<br>(-24 Box, -12 Box, TTS, UAS)                    |
| J23106                    | Anderson promoter                                 | TTTACGGCTAGCTCAGTCTAGGTATAGTGCTAGC                                                                                                                                                                                    |
| P <sub>T7</sub>           | T7 promoter                                       | TAATACGACTCACTATAGG                                                                                                                                                                                                   |

## References

1. Y. Liu, X. Wan, B. Wang, Engineered CRISPRa enables programmable eukaryote-like gene activation in bacteria. *Nat Commun* **10**, 3693 (2019).
2. R. Silva-Rocha *et al.*, The Standard European Vector Architecture (SEVA): a coherent platform for the analysis and deployment of complex prokaryotic phenotypes. *Nucleic Acids Res* **41**, D666-675(2013).
